# Supplementary material for: π-Expanded triple [5]helicenes bearing dibenzocoronene monoimide subunits
Source: Royal Society of Chemistry journal article supplement (doi:10.1039/d2cc00957a), 2022-01-01
Supplement: d2cc00957a1.pdf [file d2cc00957a1.pdf]

*Supporting Information for:*

# **$\pi$ -Expanded Triple [5]Helicenes Bearing Dibenzocoronene Monoimide Subunits**

## **Table of contents**

|                                                                                             |            |
|---------------------------------------------------------------------------------------------|------------|
| <b>1. Materials and Methods.....</b>                                                        | <b>S2</b>  |
| <b>2. Synthesis and Characterization of Compounds.....</b>                                  | <b>S2</b>  |
| <b>3. CV and UV Spectra of the Compounds.....</b>                                           | <b>S4</b>  |
| <b>4. X-ray Crystallographic Data for Compounds.....</b>                                    | <b>S5</b>  |
| <b>5. Dynamic NMR and the Thermal Interconversion.....</b>                                  | <b>S6</b>  |
| <b>6. Density Functional Theory Results.....</b>                                            | <b>S7</b>  |
| <b>7. GIWAXS and AFM of the Thin Films.....</b>                                             | <b>S9</b>  |
| <b>8. OFET Fabrication and Characterization.....</b>                                        | <b>S10</b> |
| <b>9. <sup>1</sup>H NMR, <sup>13</sup>C NMR, 2D NMR, and HRMS Spectra of Compounds.....</b> | <b>S11</b> |
| <b>10. References.....</b>                                                                  | <b>S30</b> |

## 1. Materials and Methods:

All chemicals were purchased from commercial suppliers and used without further purification unless otherwise specified. THF were freshly distilled prior to use.  $^1\text{H}$  NMR and  $^{13}\text{C}$  NMR spectra were recorded in deuterated solvents on Bruker ADVANCE 400 NMR Spectrometer.  $^1\text{H}$  NMR spectra were referenced to the signals of  $\text{CDCl}_3$  ( $\delta = 7.26$  ppm) or  $\text{C}_2\text{D}_2\text{Cl}_4$  ( $\delta = 6.00$  ppm).  $^{13}\text{C}$  NMR spectra were referenced to the signals of  $\text{CDCl}_3$  ( $\delta = 77.20$  ppm). TOCSY and NOESY spectra were referenced to the signals of  $\text{C}_6\text{D}_6$  ( $\delta = 7.16$  ppm). High resolution mass spectra (HRMS) were determined on IonSpec 9.4 Tesla Fourier Transform Mass Spectrometer.

## 2. Synthesis and Characterization of Compounds

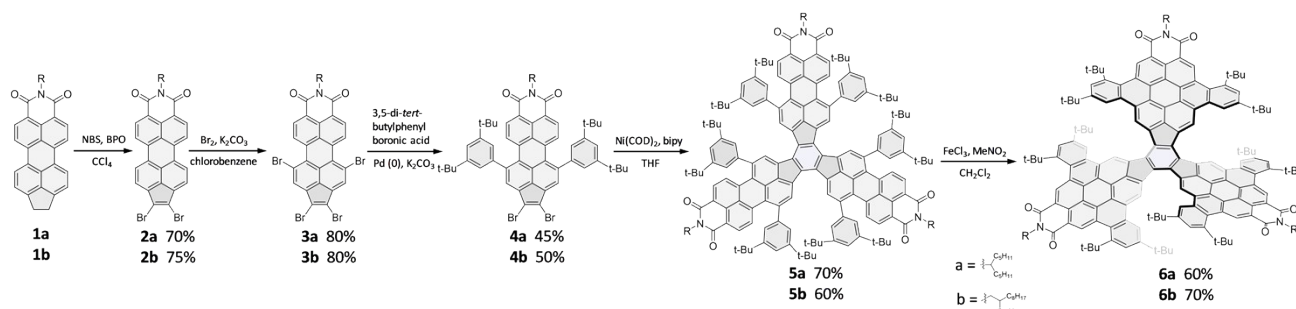

*N*-(1-Pentylhexyl)-1,2-dihydrocyclopenta[cd]perylene-7,8-dicarboximide (**1a**) and *N*-(2-Octyldodecyl)-1,2-dihydrocyclopenta[cd]perylene-7,8-dicarboximide (**1b**). **1a** and **1b** were prepared according to the literature.<sup>[1]</sup>

**1a**:  $^1\text{H}$  NMR (400 MHz,  $\text{CDCl}_3$ )  $\delta$  8.28 (s, 2H), 7.77 (t,  $J = 7.2$  Hz, 4H), 7.10 (d,  $J = 7.4$  Hz, 2H), 5.39–5.09 (m, 1H), 3.26 (s, 4H), 2.42–2.17 (m, 2H), 1.90 (m, 2H), 1.51–1.20 (m, 12H), 0.87 (t,  $J = 6.6$  Hz, 6H);  $^{13}\text{C}$  NMR (101 MHz,  $\text{CDCl}_3$ )  $\delta$  165.14, 164.24, 149.24, 139.18, 136.69, 131.30, 130.04, 126.77, 125.37, 125.29, 124.51, 120.65, 118.55, 54.25, 32.45, 31.88, 30.93, 26.82, 22.67, 14.12; HRMS (MALDI-TOF)  $m/z$  calculated for  $\text{C}_{35}\text{H}_{35}\text{NO}_2$  501.2667; found 501.2663.

**1b**:  $^1\text{H}$  NMR (400 MHz,  $\text{CDCl}_3$ )  $\delta$  7.84 (d,  $J = 7.9$  Hz, 2H), 7.38 (d,  $J = 7.5$  Hz, 2H), 7.26 (d,  $J = 8.0$  Hz, 2H), 6.87 (d,  $J = 7.3$  Hz, 2H), 4.00 (d,  $J = 7.1$  Hz, 2H), 3.13 (s, 4H), 2.09–1.84 (m, 1H), 1.47–1.17 (m, 32H), 0.98–0.78 (m, 6H);  $^{13}\text{C}$  NMR (101 MHz,  $\text{CDCl}_3$ )  $\delta$  163.93, 149.09, 138.75, 136.11, 130.14, 129.25, 126.09, 124.85, 124.59, 124.10, 120.30, 119.09, 118.14, 44.33, 36.85, 31.94, 31.77, 30.83, 30.20, 29.71, 29.69, 29.66, 29.38, 26.56, 22.69, 14.12. HRMS (MALDI-TOF)  $m/z$ : calculated for  $\text{C}_{44}\text{H}_{54}\text{NO}_2$  628.4154; found 628.4152.

*N*-(1-Pentylhexyl)-1,2-dibromocyclopenta[cd]perylene-7,8-dicarboximide (**2a**) and *N*-(2-Octyldodecyl)-1,2-dibromocyclopenta[cd]perylene-7,8-dicarboximide (**2b**). Compound **1a** or **1b** (1 mmol), NBS (4 mmol, 4 eq), BPO (75%, 0.1 mmol, 0.1 eq) were added in  $\text{CCl}_4$  (20 ml). The mixture was refluxed with stirring for 4 h under  $\text{N}_2$  atmosphere. After cooling, the reaction was quenched with saturated  $\text{Na}_2\text{SO}_3$ , and then extracted with  $\text{CH}_2\text{Cl}_2$  (3 $\times$ ). The combined organic fractions were then washed with water, dried ( $\text{Na}_2\text{SO}_4$ ), and concentrated in vacuo. The crude product was purified by column chromatography ( $\text{CH}_2\text{Cl}_2$ /petroleum ether = 1/1, v/v) to yield the corresponding **2a** or **2b** as red solids.

**2a**: (0.46 g, 70%)  $^1\text{H}$  NMR (400 MHz,  $\text{CDCl}_3$ )  $\delta$  8.38 (s, 2H), 7.86 (d,  $J = 8.0$  Hz, 2H), 7.40 (d,  $J = 7.6$  Hz, 2H), 6.88 (d,  $J = 7.4$  Hz, 2H), 5.24–5.14 (m, 1H), 2.40–2.21 (m, 2H), 2.07–1.85 (m, 2H), 1.51–1.31 (m, 12H), 0.89 (t,  $J = 6.9$  Hz, 6H);  $^{13}\text{C}$  NMR (100 MHz,  $\text{CDCl}_3$ )  $\delta$  = 164.66, 136.57, 133.49, 130.52, 129.69, 129.14, 126.10, 124.28, 123.08, 122.17, 122.01, 121.56, 120.51, 54.61, 32.49, 31.86, 26.86, 22.70, 14.16; HRMS (MALDI-TOF)  $m/z$ : calculated for  $\text{C}_{35}\text{H}_{32}\text{Br}_2\text{NO}_2$  656.0799; found 656.0783.

**2b**: (0.59 g, 75%)  $^1\text{H}$  NMR (400 MHz,  $\text{CDCl}_3$ )  $\delta$  = 8.37 (d,  $J = 7.8$  Hz, 2H), 8.05 (d,  $J = 7.0$  Hz, 2H), 7.76 (d,  $J = 5.4$  Hz, 2H), 7.28–7.22 (m, 2H), 4.08 (d,  $J = 7.3$  Hz, 2H), 1.99–1.90 (m, 1H), 1.47–1.08 (m, 32H), 0.85 (t,  $J = 6.7$  Hz, 6H);  $^{13}\text{C}$  NMR (100 MHz,  $\text{CDCl}_3$ )  $\delta$  = 163.34, 136.51, 133.16, 130.44, 129.32, 128.51, 125.87, 123.86, 122.98, 122.45, 122.06, 121.67, 120.59, 44.60, 36.90, 31.96, 31.76, 30.21, 29.74, 29.72, 29.71, 29.68, 29.40, 26.54, 22.71, 14.15; HRMS (MALDI-TOF)  $m/z$ : calculated for  $\text{C}_{44}\text{H}_{50}\text{Br}_2\text{NO}_2$  784.2187; found 784.21848.

*N*-(1-Pentylhexyl)-1,2,4,11-tetrabromocyclopenta[cd]perylene-7,8-dicarboximide (**3a**) and *N*-(2-Octyldodecyl)-1,2,4,11-tetrabromocyclopenta[cd]perylene-7,8-dicarboximide (**3b**). To the solution of compound **2a** or **2b** (0.5 mmol) and K<sub>2</sub>CO<sub>3</sub> (1.5 mmol, 3 eq) in chlorobenzene, Br<sub>2</sub> (1.5 mmol, 3 eq) was added and stirred at 80 °C for 24 h. After cooling, the reaction was quenched with saturated Na<sub>2</sub>SO<sub>3</sub>, and extracted with CH<sub>2</sub>Cl<sub>2</sub> (3×). The combined organic fractions were washed with water, dried (Na<sub>2</sub>SO<sub>4</sub>), and concentrated in vacuo. The crude product was purified by column chromatography (CH<sub>2</sub>Cl<sub>2</sub>/petroleum ether = 1/2, v/v) to yield the corresponding **3a** or **3b** as red solids.

**3a**: (0.33 g, 80%) <sup>1</sup>H NMR (400 MHz, CDCl<sub>3</sub>) δ = 9.37 (d, *J* = 8.2 Hz, 2H), 8.48 (d, *J* = 6.4 Hz, 2H), 7.37 (s, 2H), 5.41–4.99 (m, 1H), 2.43–2.19 (m, 2H), 1.94–1.84 (m, 2H), 1.46–1.21 (m, 12H), 0.88 (t, *J* = 6.8 Hz, 6H); <sup>13</sup>C NMR (100 MHz, CDCl<sub>3</sub>) δ = 164.44, 163.41, 135.91, 131.66, 131.15, 130.22, 129.50, 128.26, 127.87, 126.72, 125.18, 125.04, 124.25, 123.70, 123.43, 121.00, 120.68, 54.75, 32.43, 31.82, 26.77, 22.67, 14.13; HRMS (MALDI-TOF) *m/z*: calculated for C<sub>35</sub>H<sub>30</sub>Br<sub>4</sub>NO<sub>2</sub> 811.9010; found 811.9004.

**3b**: (0.38 g, 80%) <sup>1</sup>H NMR (400 MHz, CDCl<sub>3</sub>) δ = 9.63 (d, *J* = 8.2 Hz, 2H), 8.60 (d, *J* = 8.2 Hz, 2H), 7.90 (s, 2H), 4.14 (d, *J* = 7.4 Hz, 2H), 2.24–1.88 (m, 1H), 1.45–1.13 (m, 32H), 0.85 (t, *J* = 5.8 Hz, 6H). <sup>13</sup>C NMR (100 MHz, CDCl<sub>3</sub>) δ = 163.59, 136.74, 134.73, 132.40, 131.45, 129.94, 128.50, 128.13, 126.83, 123.25, 121.49, 121.21, 44.70, 36.71, 31.92, 31.90, 31.73, 30.09, 29.70, 29.65, 29.60, 29.35, 29.32, 26.54, 22.67, 14.11; HRMS (MALDI-TOF) *m/z*: calculated for C<sub>44</sub>H<sub>47</sub>Br<sub>4</sub>NO<sub>2</sub> 941.0299; found 941.0299.

*N*-(1-Pentylhexyl)-1,2-dibromo-4,11-bis(3,5-di-*tert*-butylphenyl)-ocyclopenta[cd]perylene-7,8-dicarboximide (**4a**) and *N*-(2-Octyldodecyl)-1,2-dibromo-4,11-bis(3,5-di-*tert*-butylphenyl)-ocyclopenta[cd]perylene-7,8-dicarboximide (**4b**). The mixture solution of **3a** or **3b** (0.5 mmol), 3,5-di-*tert*-butylphenylboronic acid (1.1 mmol, 2.2 eq), Pd(PPh<sub>3</sub>)<sub>4</sub> (0.05 mmol, 0.1 eq) in THF (15 ml) and 2 M K<sub>2</sub>CO<sub>3</sub> (5 ml) was heated to 80 °C for 3 h under N<sub>2</sub> atmosphere. After cooling, the reaction was poured into water, and extracted with CH<sub>2</sub>Cl<sub>2</sub> (3×). The combined organic fractions were washed with water, dried (Na<sub>2</sub>SO<sub>4</sub>), and concentrated in vacuo. The crude product was purified by column chromatography (CH<sub>2</sub>Cl<sub>2</sub>/petroleum ether = 1/4, v/v) to yield the corresponding **4a** or **4b** as red solids.

**4a**: (0.23 g, 45%) <sup>1</sup>H NMR (400 MHz, CDCl<sub>3</sub>) δ = 8.03 (s, 2H), 7.67 (s, 2H), 7.61 (d, *J* = 8.2 Hz, 2H), 7.57 (s, 2H), 7.30 (s, 4H), 5.16–5.08 (m, 1H), 2.23–2.13 (m, 2H), 1.90–1.69 (m, 2H), 1.35 (s, 36H), 1.29–1.17 (m, 12H), 0.82–0.76 (m, 6H); <sup>13</sup>C NMR (100 MHz, CDCl<sub>3</sub>) δ = 152.08, 151.78, 142.76, 141.75, 135.57, 133.96, 128.01, 127.84, 127.29, 125.90, 124.42, 124.21, 121.58, 120.85, 120.30, 53.21, 34.09, 31.24, 30.60, 30.44, 25.44, 21.47, 12.94; HRMS (MALDI-TOF) *m/z*: calculated for C<sub>63</sub>H<sub>71</sub>Br<sub>2</sub>NO<sub>2</sub> 1031.3851; found 1031.3860.

**4b**: (0.29 g, 50%) <sup>1</sup>H NMR (400 MHz, CDCl<sub>3</sub>) δ = 8.05 (d, *J* = 8.3 Hz, 2H), 7.67 (s, 2H), 7.60 (d, *J* = 8.3 Hz, 2H), 7.56 (s, 2H), 7.29 (d, *J* = 1.6 Hz, 4H), 4.03 (d, *J* = 7.2 Hz, 2H), 1.96–1.88 (m, 1H), 1.34 (s, 36H), 1.29–1.11 (m, 32H), 0.88–0.78 (m, 6H). <sup>13</sup>C NMR (100 MHz, CDCl<sub>3</sub>) δ = 163.99, 153.11, 143.88, 142.70, 136.71, 135.18, 129.57, 129.01, 128.31, 127.05, 125.43, 125.25, 122.67, 121.90, 121.75, 121.41, 44.31, 36.57, 35.12, 31.91, 31.88, 31.71, 31.47, 30.03, 29.66, 29.64, 29.59, 29.54, 29.36, 29.31, 26.44, 22.67, 14.10. HRMS (MALDI-TOF) *m/z*: calculated for C<sub>72</sub>H<sub>90</sub>Br<sub>2</sub>NO<sub>2</sub> 1158.5338; found 1158.5339.

*N*-(1-Pentylhexyl)-4,7,14,17,24,27-hept(3,5-di-*tert*-butylphenyl)-triaceperylene-1,10,11,20,21,30-hexacarboximide (**5a**) and *N*-(2-Octyldodecyl)-4,7,14,17,24,27-hept(3,5-di-*tert*-butylphenyl)-triaceperylene-1,10,11,20,21,30-hexacarboximide (**5b**). Ni(COD)<sub>2</sub> (2 mmol, 2 eq) was added to the solution of COD (2 mmol, 2 eq) and Bipy (2 mmol, 2 eq) in dried THF (30 ml) under N<sub>2</sub> atmosphere. **4a** or **4b** (1 mmol) was dissolved into the dried THF (80 ml) and added dropwise over 20 min. The mixture was heated to 70 °C and stirred overnight. After cooling, the reaction mixture was filtered, concentrated in vacuo, and purified by column chromatography (CH<sub>2</sub>Cl<sub>2</sub>/petroleum ether = 1/3, v/v) to yield the corresponding **5a** or **5b** as blue solids.

**5a**: (0.6 g, 70%) <sup>1</sup>H NMR (400 MHz, CDCl<sub>3</sub>) δ = 8.79 (s, 6H), 7.95 (s, 6H), 7.49 (s, 6H), 7.21 (d, *J* = 1.6 Hz, 12H), 6.96 (d, *J* = 8.2 Hz, 6H), 5.19–4.96 (m, 3H), 2.34–2.10 (m, 6H), 1.86–1.71 (m, 6H), 1.25 (d, *J* = 3.4 Hz, 36H), 1.20 (s, 108H), 0.80 (t, *J* = 6.8 Hz, 18H); <sup>13</sup>C NMR (100 MHz, CDCl<sub>3</sub>) δ = 152.83, 144.55, 142.52, 137.23, 136.96, 135.50, 133.37, 128.90, 128.63, 128.07, 128.03, 127.94, 127.42, 123.14, 121.81, 54.07, 34.96, 32.25, 31.89, 31.64,

31.50, 29.71, 26.42, 22.70, 22.54, 13.99; HRMS (MALDI-TOF)  $m/z$ : calculated for  $C_{189}H_{213}N_3O_6$  2622.6512; found 2622.6495.

**5b**: (0.6 g, 60%)  $^1H$  NMR (400 MHz,  $CDCl_3$ )  $\delta$  = 8.80 (s, 6H), 7.98 (d,  $J$  = 8.2 Hz, 6H), 7.50 (s, 6H), 7.21 (d,  $J$  = 1.5 Hz, 12H), 6.97 (d,  $J$  = 8.2 Hz, 6H), 4.05 (d,  $J$  = 7.1 Hz, 6H), 2.10–1.81 (m, 3H), 1.34–1.15 (m, 204H), 0.88–0.81 (m, 18H);  $^{13}C$  NMR (100 MHz,  $CDCl_3$ )  $\delta$  = 164.12, 152.84, 144.63, 142.47, 137.31, 137.02, 135.68, 133.37, 129.56, 128.85, 128.51, 128.19, 127.97, 127.45, 123.14, 121.84, 120.54, 44.21, 36.56, 34.95, 31.92, 31.90, 31.50, 30.07, 30.06, 29.68, 29.65, 29.61, 29.56, 29.37, 29.34, 26.50, 22.68, 14.12; HRMS (MALDI-TOF)  $m/z$ : calculated for  $C_{216}H_{267}N_3O_6$  3001.07470; found 3001.07510.

*N*-(1-Pentylhexyl)-3,5,10,12,17,19,24,26,31,33-dodeca(3,5-di-*tert*-butylphenyl)-tridibenzo(dm)coronylene-1,14,15,28,29,42-hexacarboximide (**6a**) and *N*-(2-Octyldodecyl)-3,5,10,12,17,19,24,26,31,33-dodeca(3,5-di-*tert*-butylphenyl)-tridibenzo(dm)coronylene-1,14,15,28,29,42-hexacarboximide (**6b**).  $FeCl_3$  (1.2 mmol, 60 eq) in  $CH_3NO_2$  (3 ml) was added dropwise to **5a** or **5b** (0.02 mmol) in  $CH_2Cl_2$  (30 ml) under  $N_2$  atmosphere. The reaction mixture was stirred for 20 min at room temperature, then quenched with methanol, extracted with  $CH_2Cl_2$ , purified by column chromatography ( $CH_2Cl_2$ /petroleum ether = 1/2, v/v), followed by HPLC to yield the corresponding **6a** or **6b** as red solids.

**6a**: (0.031 g, 60%)  $^1H$  NMR (400 MHz,  $CDCl_3$ )  $\delta$  = 11.47–10.86 (m, 6H), 10.66–9.82 (m, 6H), 9.61–8.89 (m, 6H), 8.7–8.35 (m, 6H), 5.45 (m, 3H), 2.80–2.15 (m, 12H), 2.15–1.95 (m, 36H), 1.91–1.03 (m, 108H), 0.95–0.60 (m, 18H);  $^{13}C$  NMR (600 MHz,  $CDCl_3$ )  $\delta$  = 165.50, 164.28, 149.20, 148.94, 148.44, 148.17, 147.87, 147.64, 147.36, 139.38, 138.83, 136.88, 136.37, 136.28, 136.10, 135.99, 134.13, 133.81, 133.34, 133.09, 130.96, 130.59, 130.50, 130.23, 130.08, 128.76, 128.68, 128.18, 127.56, 127.36, 126.85, 126.79, 124.75, 124.37, 123.30, 121.68, 121.37, 121.29, 120.68, 120.34, 117.90, 117.62, 117.44, 117.07, 116.82, 116.68, 116.54, 53.70, 38.25, 34.13, 31.82, 31.53, 31.04, 30.92, 30.81, 30.71, 30.45, 30.23, 29.92, 28.63, 25.94, 25.78, 25.55, 21.61, 21.41, 13.14, 13.04, 12.87. HRMS (MALDI-TOF)  $m/z$ : calculated for  $C_{189}H_{201}N_3O_6$  2610.5582; found 2610.5565.

**6b**: (0.042 g, 70%)  $^1H$  NMR (400 MHz,  $CDCl_3$ )  $\delta$  = 11.58–10.93 (m, 6H), 10.68–10.04 (m, 6H), 9.68–8.81 (m, 6H), 8.75–8.37 (m, 6H), 4.46 (M, 6H), 2.66–2.15 (m, 3H), 2.02 (d,  $J$  = 16.1 Hz, 50H), 1.53–0.97 (m, 154H), 0.79 (M, 18H).  $^{13}C$  NMR (600 MHz,  $CDCl_3$ )  $\delta$  = 165.91, 165.74, 150.28, 150.04, 149.55, 149.28, 149.02, 148.77, 148.51, 140.55, 139.98, 138.01, 137.50, 137.40, 137.23, 137.12, 134.84, 134.54, 134.48, 132.21, 132.07, 131.94, 131.77, 131.57, 131.33, 131.19, 129.82, 129.73, 129.24, 128.56, 127.87, 125.95, 125.76, 125.48, 124.23, 122.86, 122.35, 121.74, 118.99, 118.52, 117.95, 117.76, 45.02, 39.34, 36.67, 36.57, 35.35, 35.16, 35.06, 31.87, 31.69, 31.54, 31.28, 31.01, 30.19, 29.72, 29.65, 29.31, 26.55, 22.65, 14.10. HRMS (MALDI-TOF)  $m/z$ : calculated for  $C_{216}H_{255}N_3O_6$  2988.9808; found 2988.9777.

### 3. CV and UV Spectra of the Compounds

Cyclic voltammograms (CVs) were recorded on a 1000B model electrochemical workstation using glassy carbon discs as the working electrode, Pt wire as the counter electrode,  $Ag/Ag^+$  electrode as the reference electrode, ferrocene/ferrocenium as an internal potential marker, and tetrabutylammonium hexafluorophosphate ( $TBAPF_6$ , 0.1 M) as the supporting electrolyte. UV/Vis absorption spectra were measured with Hitachi (model U-3010) spectrophotometer. Emission were measured in room temperature in  $CHCl_3$  ( $10^{-5}$  M); Fluorescence measurements were carried out on a FLS980 Spectrometer and quantum yield was determined by a Quanta- $\phi$  integrating sphere.

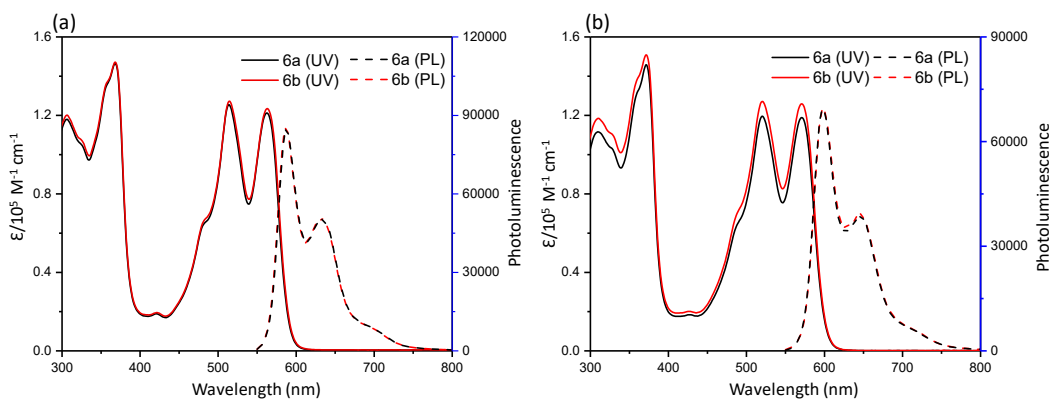

**Fig. S1** UV-vis absorption (solid line,  $10^{-5}$  M) and emission (dashed line, excitation at 520 nm) spectra of **6a** and **6b** in hexane (a) and toluene (b).

#### 4. X-ray Crystallographic Data for Compounds

Single crystals of **6a** for X-ray diffraction analysis could be obtained by slow diffusion of methanol into a toluene solution at room temperature. The X-ray diffraction data were collected on a MM007HF Saturn724+ diffractometer with graphite monochromated Cu K $\alpha$  (1.54184 Å). **6a** were refined using the SHELXL-2014.

Table S1. Crystal data and structure refinement for **6a**.

|                                                 |                                                                 |
|-------------------------------------------------|-----------------------------------------------------------------|
| Identification code                             | <b>6a</b>                                                       |
| Empirical formula                               | C <sub>189</sub> H <sub>201</sub> N <sub>3</sub> O <sub>6</sub> |
| Formula weight                                  | 2608.5512                                                       |
| Crystal system                                  | triclinic                                                       |
| Space group                                     | P-1                                                             |
| Radiation type                                  | Cu K $\alpha$                                                   |
| Radiation wavelength(Å)                         | 1.54184                                                         |
| T(K)                                            | 169.99(13)                                                      |
| a(Å)                                            | 10.23090(10)                                                    |
| b(Å)                                            | 30.6709(2)                                                      |
| c(Å)                                            | 32.1621(3)                                                      |
| $\alpha$ (deg)                                  | 81.0210(10)                                                     |
| $\beta$ (deg)                                   | 83.8780(10)                                                     |
| $\gamma$ (deg)                                  | 87.77700(10)                                                    |
| V(Å <sup>3</sup> )                              | 9909.11(15)                                                     |
| Z                                               | 2                                                               |
| $\rho_{\text{calc}}$ (g cm <sup>-3</sup> )      | 0.906                                                           |
| $\theta$ , range(°)                             | 2.169 to 75.741                                                 |
| R(int)                                          | 3.49%                                                           |
| $\mu$ (mm <sup>-1</sup> )                       | 0.406                                                           |
| F(000)                                          | 2908.0                                                          |
| Crystal size (mm <sup>3</sup> )                 | 0.04 × 0.04 × 0.02                                              |
| Index ranges                                    | -9 ≤ h ≤ 12, -38 ≤ k ≤ 38, -38 ≤ l ≤ 39                         |
| Reflections collected                           | 111270                                                          |
| Independent reflections                         | 38357 [R <sub>int</sub> = 0.0349, R <sub>sigma</sub> = 0.0371]  |
| Absorption correction                           | spherical harmonics                                             |
| Data / restraints / parameters                  | 38357/784/2222                                                  |
| Goodness-of-fit on F <sup>2</sup>               | 1.871                                                           |
| Final R indices [I > 2sigma(I)]                 | R1 = 0.0908, wR2 = 0.2517                                       |
| R indices(all data)                             | R1 = 0.1092, wR2 = 0.2668                                       |
| Largest diff. peak and hole(e.Å <sup>-3</sup> ) | 0.88/-0.45                                                      |

## 5. Dynamic NMR and the Thermal Interconversion

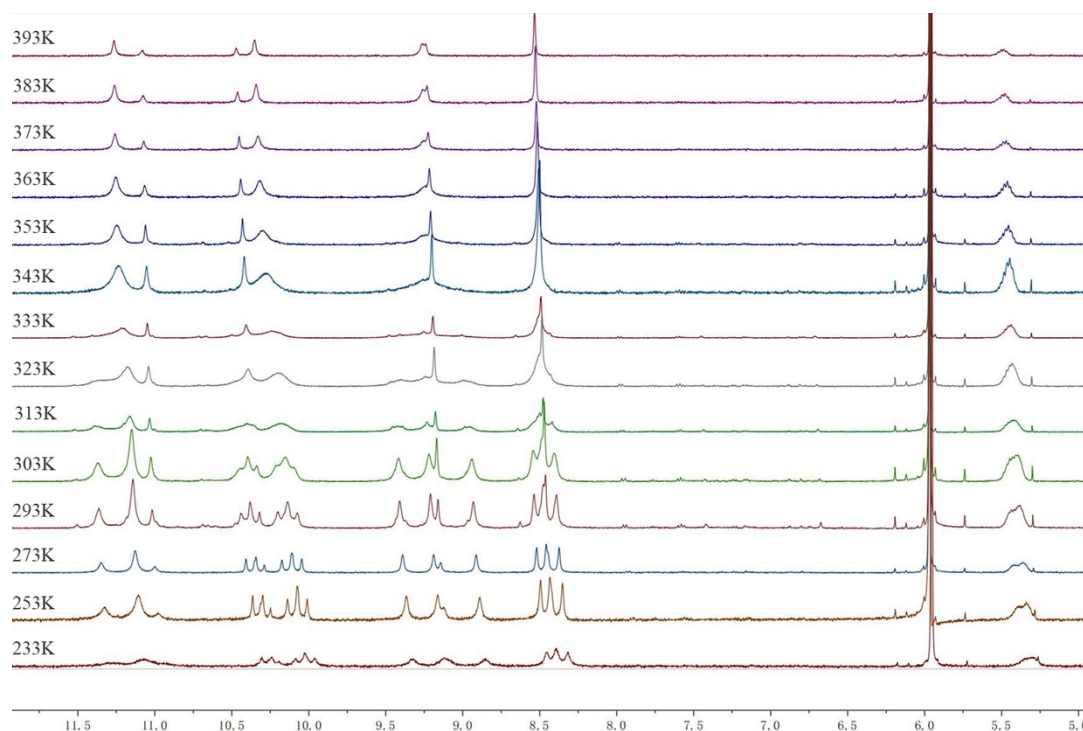

**Fig. S2** Variable-temperature  $^1\text{H}$  NMR spectrum of **6a** in 1,1,2,2-tetrachloroethane- $d_2$ .

The exchange rate constant ( $k$ ) was determined using equation as follows:

- i) For the coalescence temperature  $k$  can be calculated using:

$$k = \frac{\pi \Delta V_0}{\sqrt{2}} \quad (1)$$

- ii) At fast exchange temperature

$$k = \frac{\pi \Delta V_0^2}{\sqrt{2}} \left[ (\Delta v_e)_{\frac{1}{2}} - (\Delta v_0)_{\frac{1}{2}} \right]^{-1} \quad (2)$$

Combining with the variable-temperature  $^1\text{H}$  NMR spectra of **6a** in 1,1,2,2-tetrachloroethane- $d_2$  and the above equations, we can obtain the Table S2, then fitting with Eyring equation (Figure S2):

$$\ln \frac{k}{T} = -\frac{\Delta H^\ddagger}{RT} + \frac{\Delta S^\ddagger}{R} + \ln \frac{k_B}{h} \quad (3)$$

and then the thermodynamic parameters can be derived from:

$$\Delta G^\ddagger = \Delta H^\ddagger - T\Delta S^\ddagger \quad (4)$$

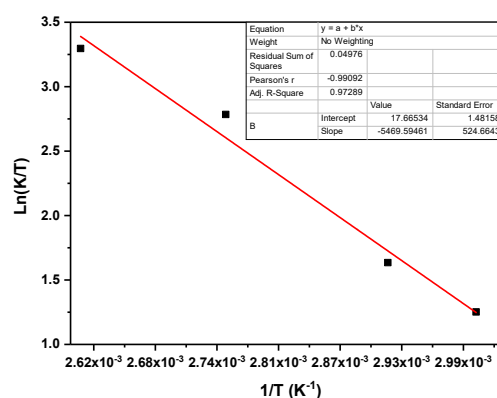

**Fig. S3** Fitting of the exchange rate constants with temperature by Eyring equation for **6a** in 1,1,2,2-tetrachloroethane- $d_2$

giving thermodynamic parameters:  $\Delta H^\ddagger = 45.47 \pm 4.4 \text{ kJ} \cdot \text{mol}^{-1}$ ;  $\Delta S^\ddagger = -50.6 \pm 12.3 \text{ J} \cdot \text{mol}^{-1} \cdot \text{K}^{-1}$ ;  $\Delta G^\ddagger_{\text{Tc}} = 61.8 \pm 1.9 \text{ kJ} \cdot \text{mol}^{-1}$  (14.8 kcal·mol<sup>-1</sup>).

Table S2. Parameters obtained from the line-shape analysis based on the variable-temperature  $^1\text{H}$  NMR spectra of **6a** in 1,1,2,2-tetrachloroethane-*d*<sub>2</sub>.

| T(K) | Peak width (Hz) | Peak separation(Hz)                                | Constant $k$ | 1/T(K)       | Ln(k/T)   |
|------|-----------------|----------------------------------------------------|--------------|--------------|-----------|
| 393  | 5.15            | $(\Delta\nu_0)_{1/2}$ for temperatures above $T_c$ |              |              |           |
| 383  | 5.65            |                                                    | 10347.480    | 0.002610     | 3.296072  |
| 363  | 6.03            |                                                    | 5879.250     | 0.002754     | 2.784369  |
| 343  | 8.09            |                                                    | 1759.776     | 0.002914     | 1.634774  |
| 333  | 9.59            |                                                    | 1165.257     | 0.003002     | 1.252104  |
| 323  | 22.2            | $T_c$                                              | 303.445      | 0.003095     | -0.062916 |
| 293  |                 | 48.2                                               |              | $\Delta V_0$ |           |

## 6. Density Functional Theory Results

DFT calculations were performed by using Gaussian 09. The geometry of compounds **6a** was optimized at the B3LYP level with the 6-31G(d, p) basis set. Time-dependent density functional theory (TD-DFT) were calculated at the B3LYP/6-31G(d, p) level in CHCl<sub>3</sub> with the SMD solvent model. For **6a**, 50 excited states were calculated. NICS values according to magnetic shielding values were calculated at the B3LYP/6-31G(d,p) level through the gauge-including atomic orbital (GIAO) method<sup>[2,3]</sup>. NICS<sub>zz</sub> values calculated 1 Å above the ring center (NICS(1)<sub>zz</sub>) and 1 Å below the ring center (NICS(-1)<sub>zz</sub>) and the results are the average of NICS(1)<sub>zz</sub> and NICS(-1)<sub>zz</sub>. UV-vis curves and NICS values of the compound were generated using Multiwfn 3.8 software<sup>[4]</sup>.

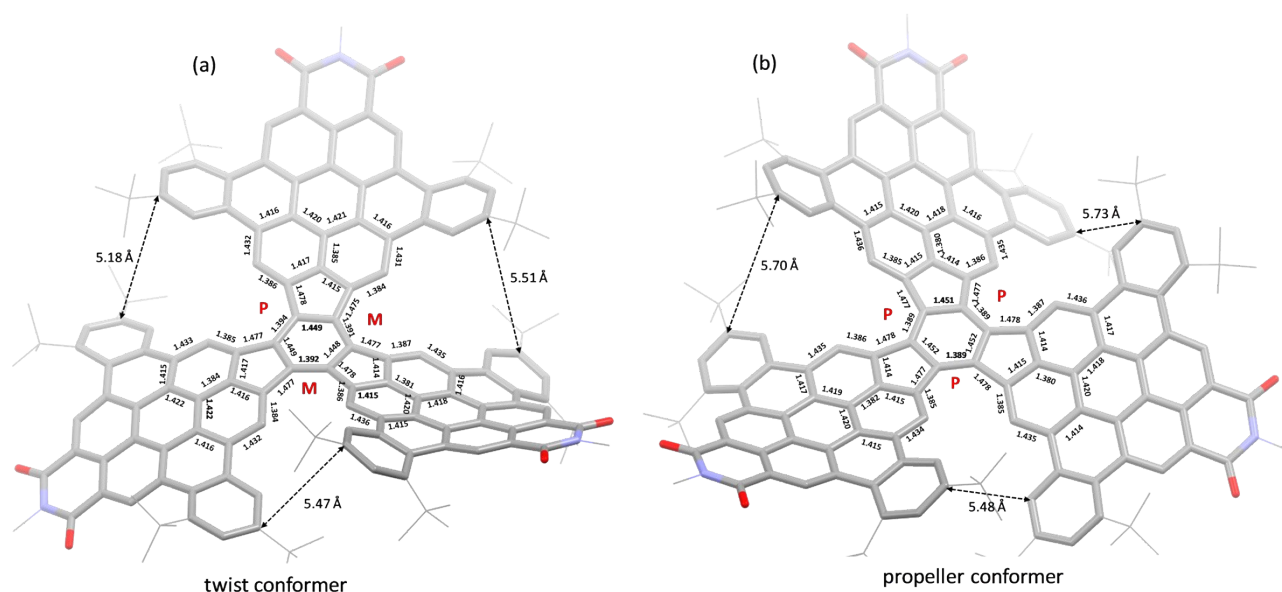

**Fig. S4** Calculated structure **6a** with selected bond lengths and the handedness. (The branched alkyl chains are replaced by methyl groups.)

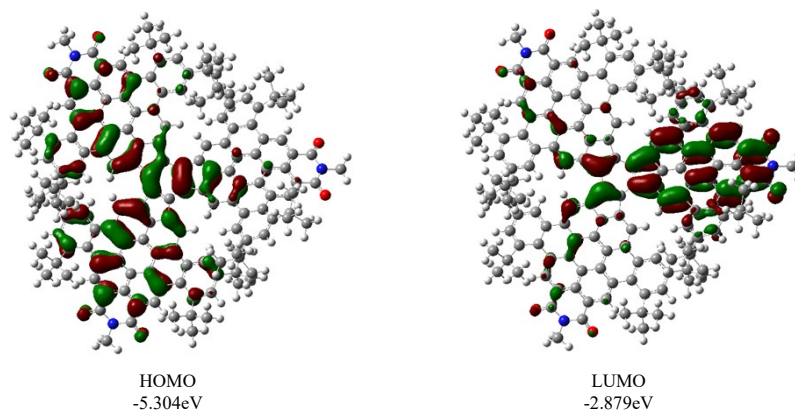

**Fig. S5** Frontier orbitals and frontier orbital energies of **6a** at the optimized  $S_0$  geometry at B3LYP/6-31G(d, p) level.

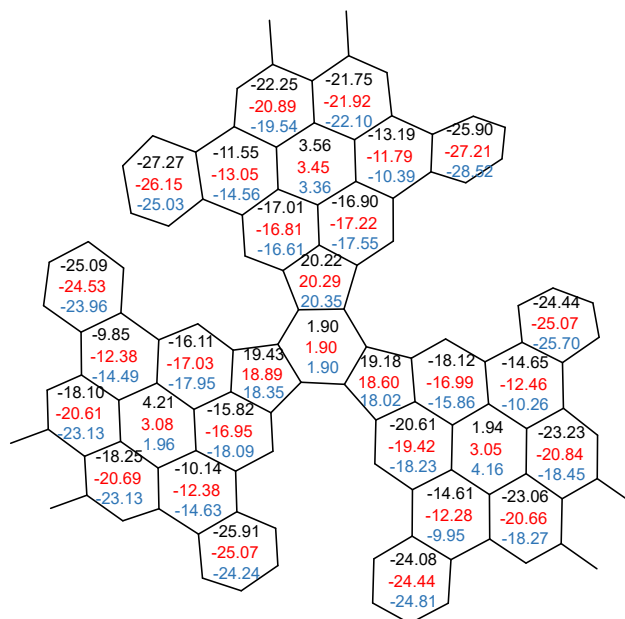

**Fig. S6** Calculated NICS(1)<sub>zz</sub> values (black), NICS(-1)<sub>zz</sub> values (blue) of **6a** at B3LYP/6-31G(d,p) level and their average NICS values (red).

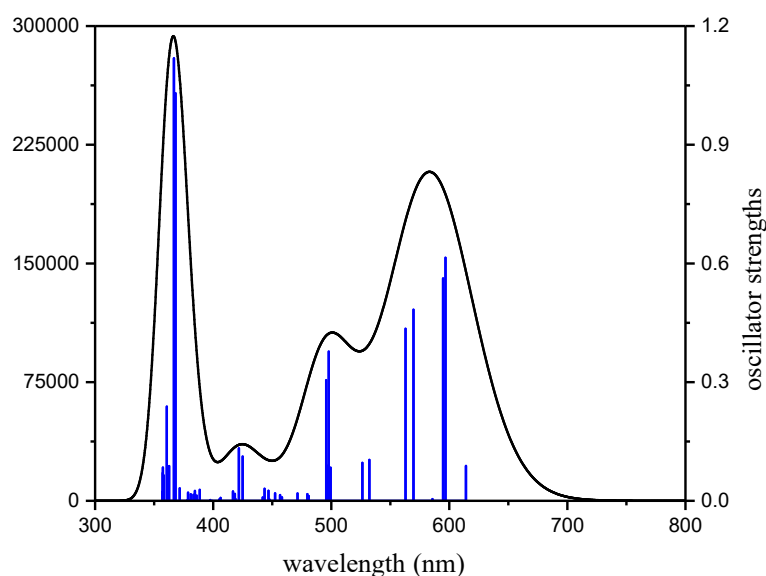

**Fig. S7** Calculated UV-vis spectrum of **6a** at the B3LYP/6-31G(d) level in  $\text{CHCl}_3$  solution.

Table S3. TD-DFT singlet excitation energies  $E$ , excitation wavelengths  $\lambda$ , oscillator strengths  $f > 0.1$ , and orbital contributions for **6a** at the optimized  $S_0$  ground state geometry at the B3LYP/6-31G(d) level in  $\text{CHCl}_3$  solution.

| Excited state | Energy (eV) | Wavelength (nm) | Osc. Strength | contributions                                                  |
|---------------|-------------|-----------------|---------------|----------------------------------------------------------------|
| S2            | 2.078       | 596.7           | 0.6144        | HOMO→LUMO+1:51.5%<br>HOMO-1→LUMO:41.3%                         |
| S3            | 2.085       | 594.7           | 0.5622        | HOMO-1→LUMO+1:76.5%<br>HOMO→LUMO:13.8%<br>HOMO-1→LUMO:6.0%     |
| S5            | 2.176       | 569.7           | 0.4831        | HOMO→LUMO+2:95.7%                                              |
| S6            | 2.203       | 562.9           | 0.4349        | HOMO-1→LUMO+2:95.0%                                            |
| S7            | 2.329       | 532.3           | 0.1036        | HOMO-2→LUMO:93.8%                                              |
| S10           | 2.490       | 497.9           | 0.3773        | HOMO-3→LUMO+1:36.5%<br>HOMO-4→LUMO:16.1%<br>HOMO-2→LUMO+2:9.2% |

|     |       |       |        |                     |
|-----|-------|-------|--------|---------------------|
|     |       |       |        | HOMO-4→LUMO+2:8.9%  |
|     |       |       |        | HOMO-4→LUMO+1:8.7%  |
| S12 | 2.501 | 495.7 | 0.3051 | HOMO-5→LUMO:64.0%   |
|     |       |       |        | HOMO-2→LUMO+2:12.4% |
| S23 | 2.917 | 425.0 | 0.1120 | HOMO-5→LUMO+2:8.0%  |
|     |       |       |        | HOMO-8→LUMO:49.7%   |
| S24 | 2.940 | 421.8 | 0.1328 | HOMO-7→LUMO:19.6%   |
|     |       |       |        | HOMO-6→LUMO+1:15.1% |
|     |       |       |        | HOMO-8→LUMO+1:47.8% |
|     |       |       |        | HOMO-6→LUMO:10.4%   |
|     |       |       |        | HOMO-6→LUMO+2:10.2% |
|     |       |       |        | HOMO-7→LUMO+1:9.4%  |
| S42 | 3.367 | 368.2 | 1.0301 | HOMO-8→LUMO:7.5%    |
|     |       |       |        | HOMO→LUMO+5:63.4%   |
|     |       |       |        | HOMO→LUMO+6:8.8%    |
| S43 | 3.381 | 366.7 | 1.1185 | HOMO-12→LUMO:5.8%   |
|     |       |       |        | HOMO-1→LUMO+5:67.2% |

## 7. GIWAXS Patterns and AFM of the Thin Films

Grazing incidence wide-angle X-ray scattering characterization of the thin films were conducted with a XEUSS SAXS/WAXS system. The scattering intensity was recorded on a 2-D image detector (Pilatus 300K) with a pixel size of  $172 \times 172 \mu\text{m}$ . The samples were exposed to an X-ray beam with the wavelength of  $1.5418 \text{ \AA}$ , and the detector was located at a distance of 133 mm from the sample center. The incidence angle was  $0.18^\circ$  to optimize the signal-to-background ratio.

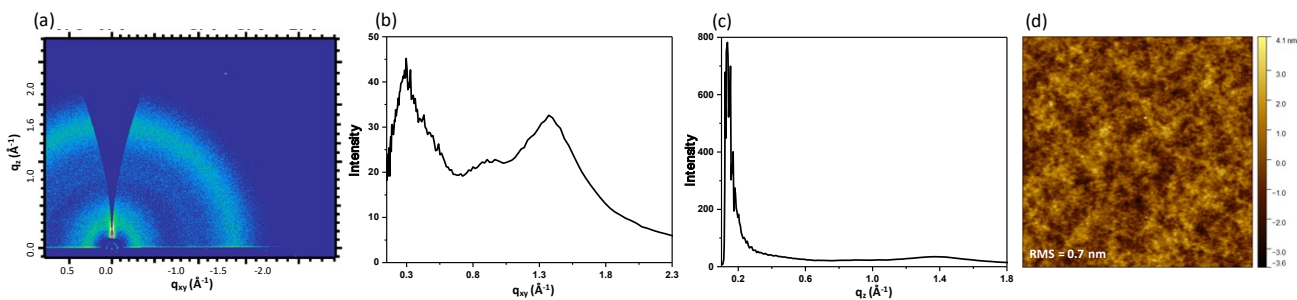

**Fig. S8** (a) 2D GIWAXS scattering patterns of the thin films of **6b**; (b) In-plane and (c) out-of-plane diffraction plots from GIWAXS patterns; (d) AFM image of the thin films of **6b**.

## 8. OFET Fabrication and Characterization

**Thin-film devices fabrication:** OTFT devices were fabricated in bottom-gate/bottom-contact type, where heavily doped silicon substrates were employed as substrate gold as source and drain electrodes, which were prepared by photolithography. The substrates were cleaned with deionized water, piranha solution ( $\text{H}_2\text{SO}_4/\text{H}_2\text{O}_2=7:3$ ), deionized water, isopropyl alcohol, and finally were blown dry with high-purity nitrogen gas. Treatment of the  $\text{SiO}_2/\text{Si}$  wafers with octadecyltrichlorosilane (OTS) was conducted by the vapor-deposition method. The clean substrates were dried under vacuum at  $90^\circ\text{C}$  for 0.5 h to eliminate the moisture. When the temperature decreased to approximately room temperature, a small drop of OTS was dropped onto the substrates. Subsequently, this system was heated to  $120^\circ\text{C}$  for 2 h under vacuum, after which the vacuum is maintained at approximately room temperature. After careful cleaning the substrates, the thin films were fabricated by spin-coating with 10 mg/ml chlorobenzene solution at 3000 rpm for 40 s, which was subsequently annealed at  $110^\circ\text{C}$  for 0.5 h under vacuum.

**Devices characterization:** All electrical characteristics of the devices were measured at room temperature using a semiconductor parameter analyser (Keithley 4200 SCS) in nitrogen atmosphere. The mobilities of the devices were calculated in the saturation regime. The equation is listed as follows:

$$I_{\text{DS}} = (W/2L)C_i\mu(V_{\text{GS}}-V_{\text{T}})^2$$

where  $W/L$  is the channel width/length,  $C_i$  is the insulator capacitance per unit area ( $10 \text{ nF/cm}^2$ ), and  $V_{\text{GS}}$  and  $V_{\text{T}}$  are

the gate voltage and threshold voltage, respectively.

## 9. $^1\text{H}$ NMR, $^{13}\text{C}$ NMR, and HRMS Spectra of Compounds

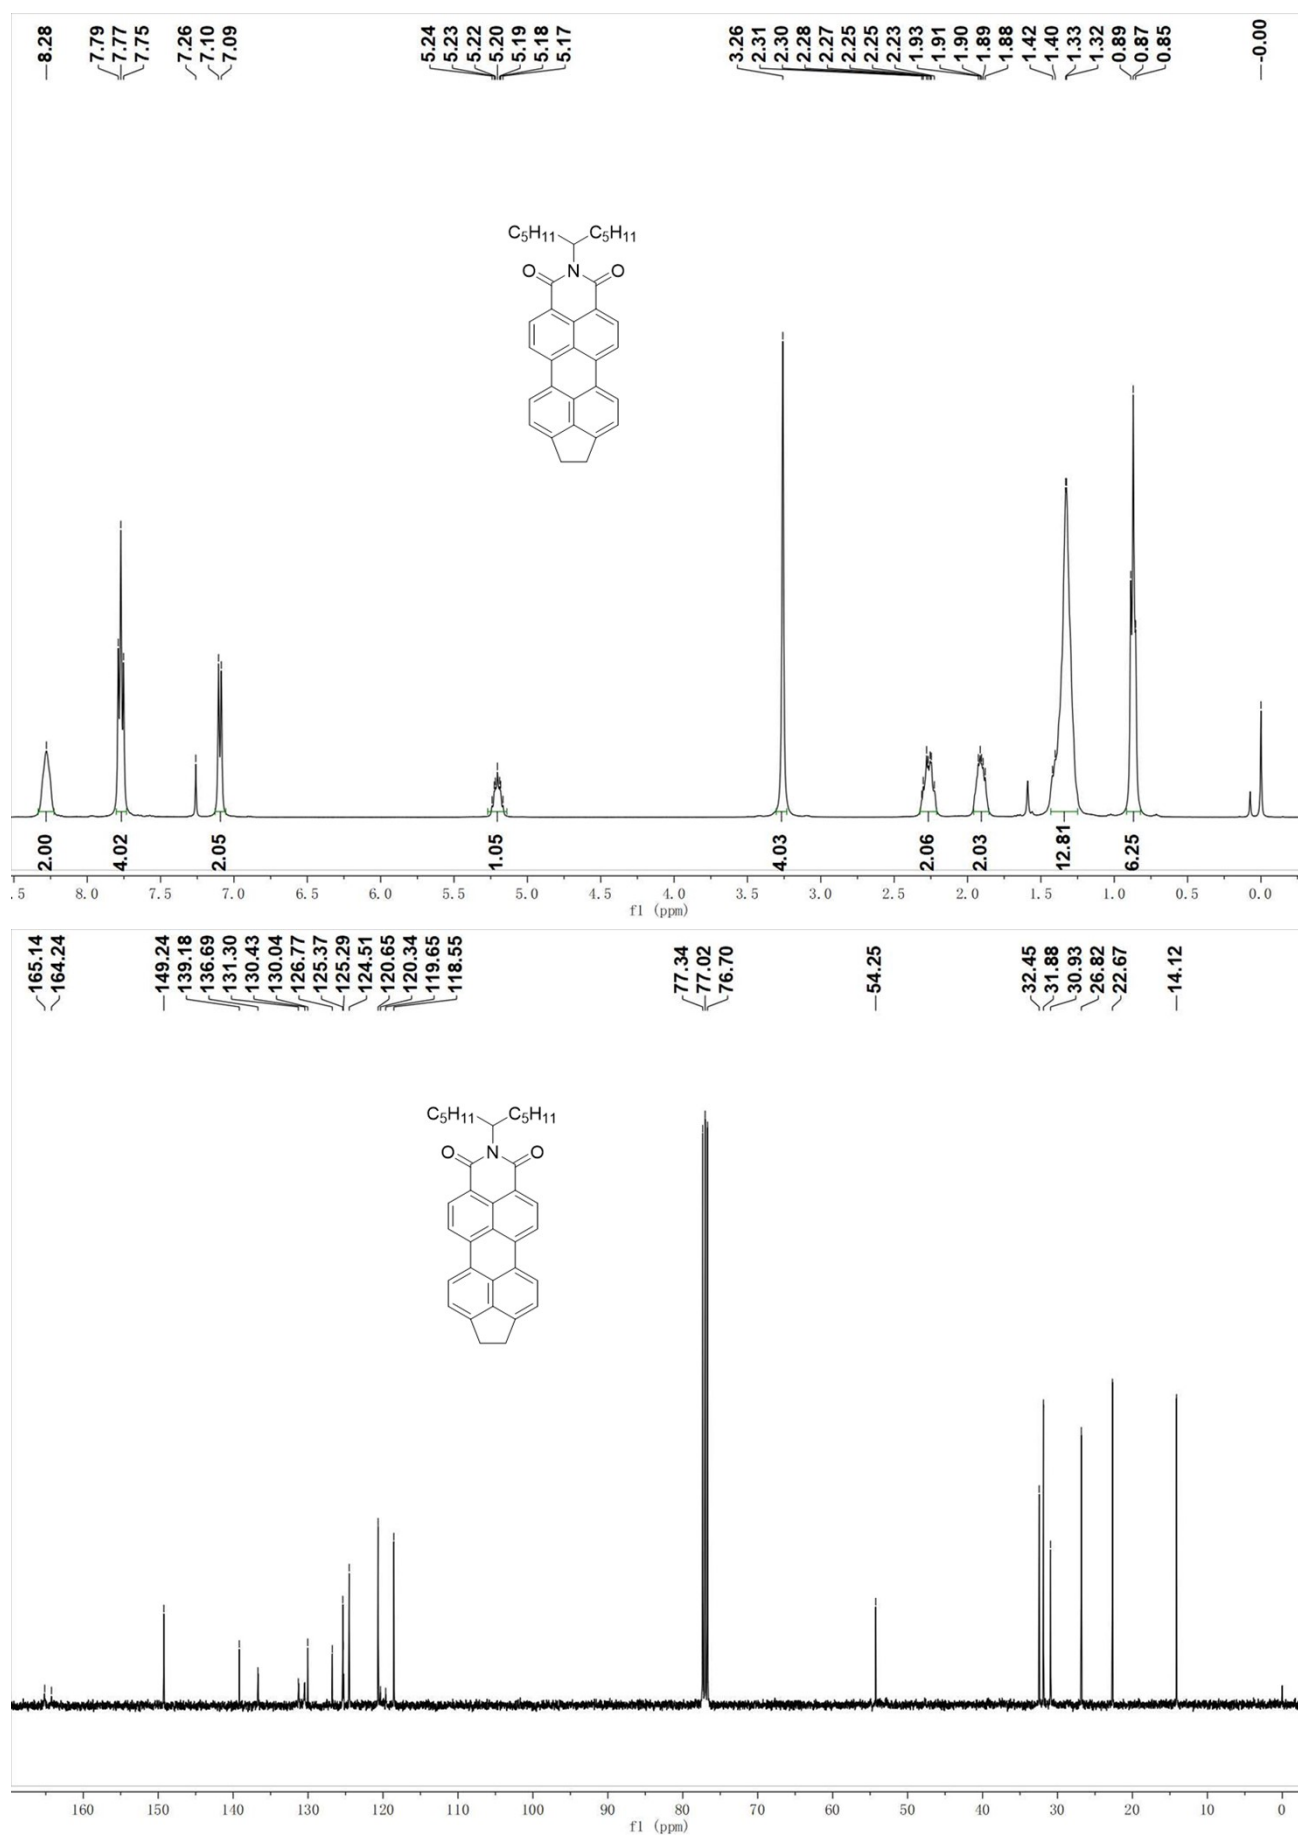

**Fig. S9**  $^1\text{H}$  NMR and  $^{13}\text{C}$  NMR spectra of **1a** in  $\text{CDCl}_3$  (400 MHz, 298 K).

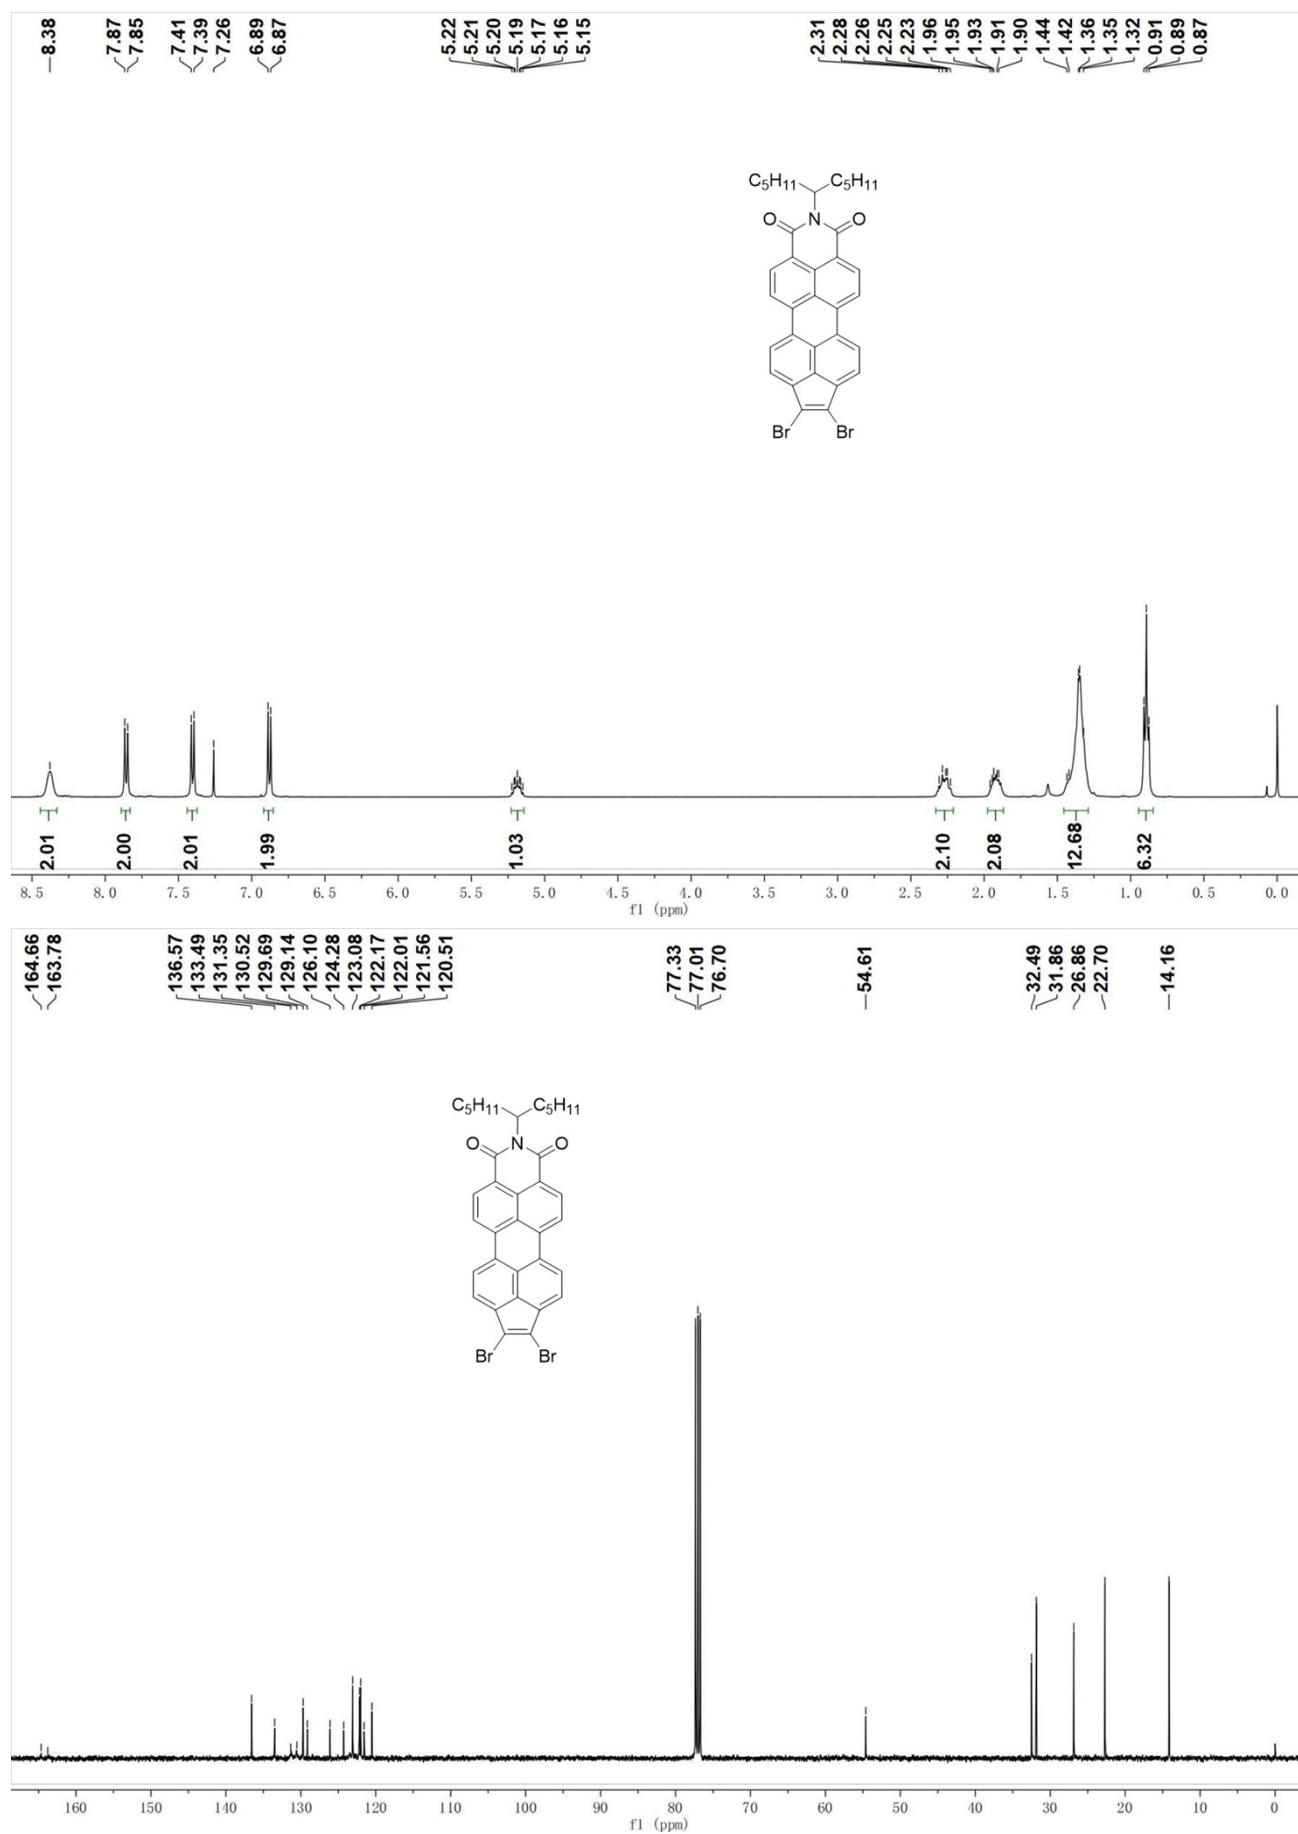

**Fig. S10** <sup>1</sup>H NMR and <sup>13</sup>C NMR spectra of **2a** in CDCl<sub>3</sub> (400 MHz, 298 K).

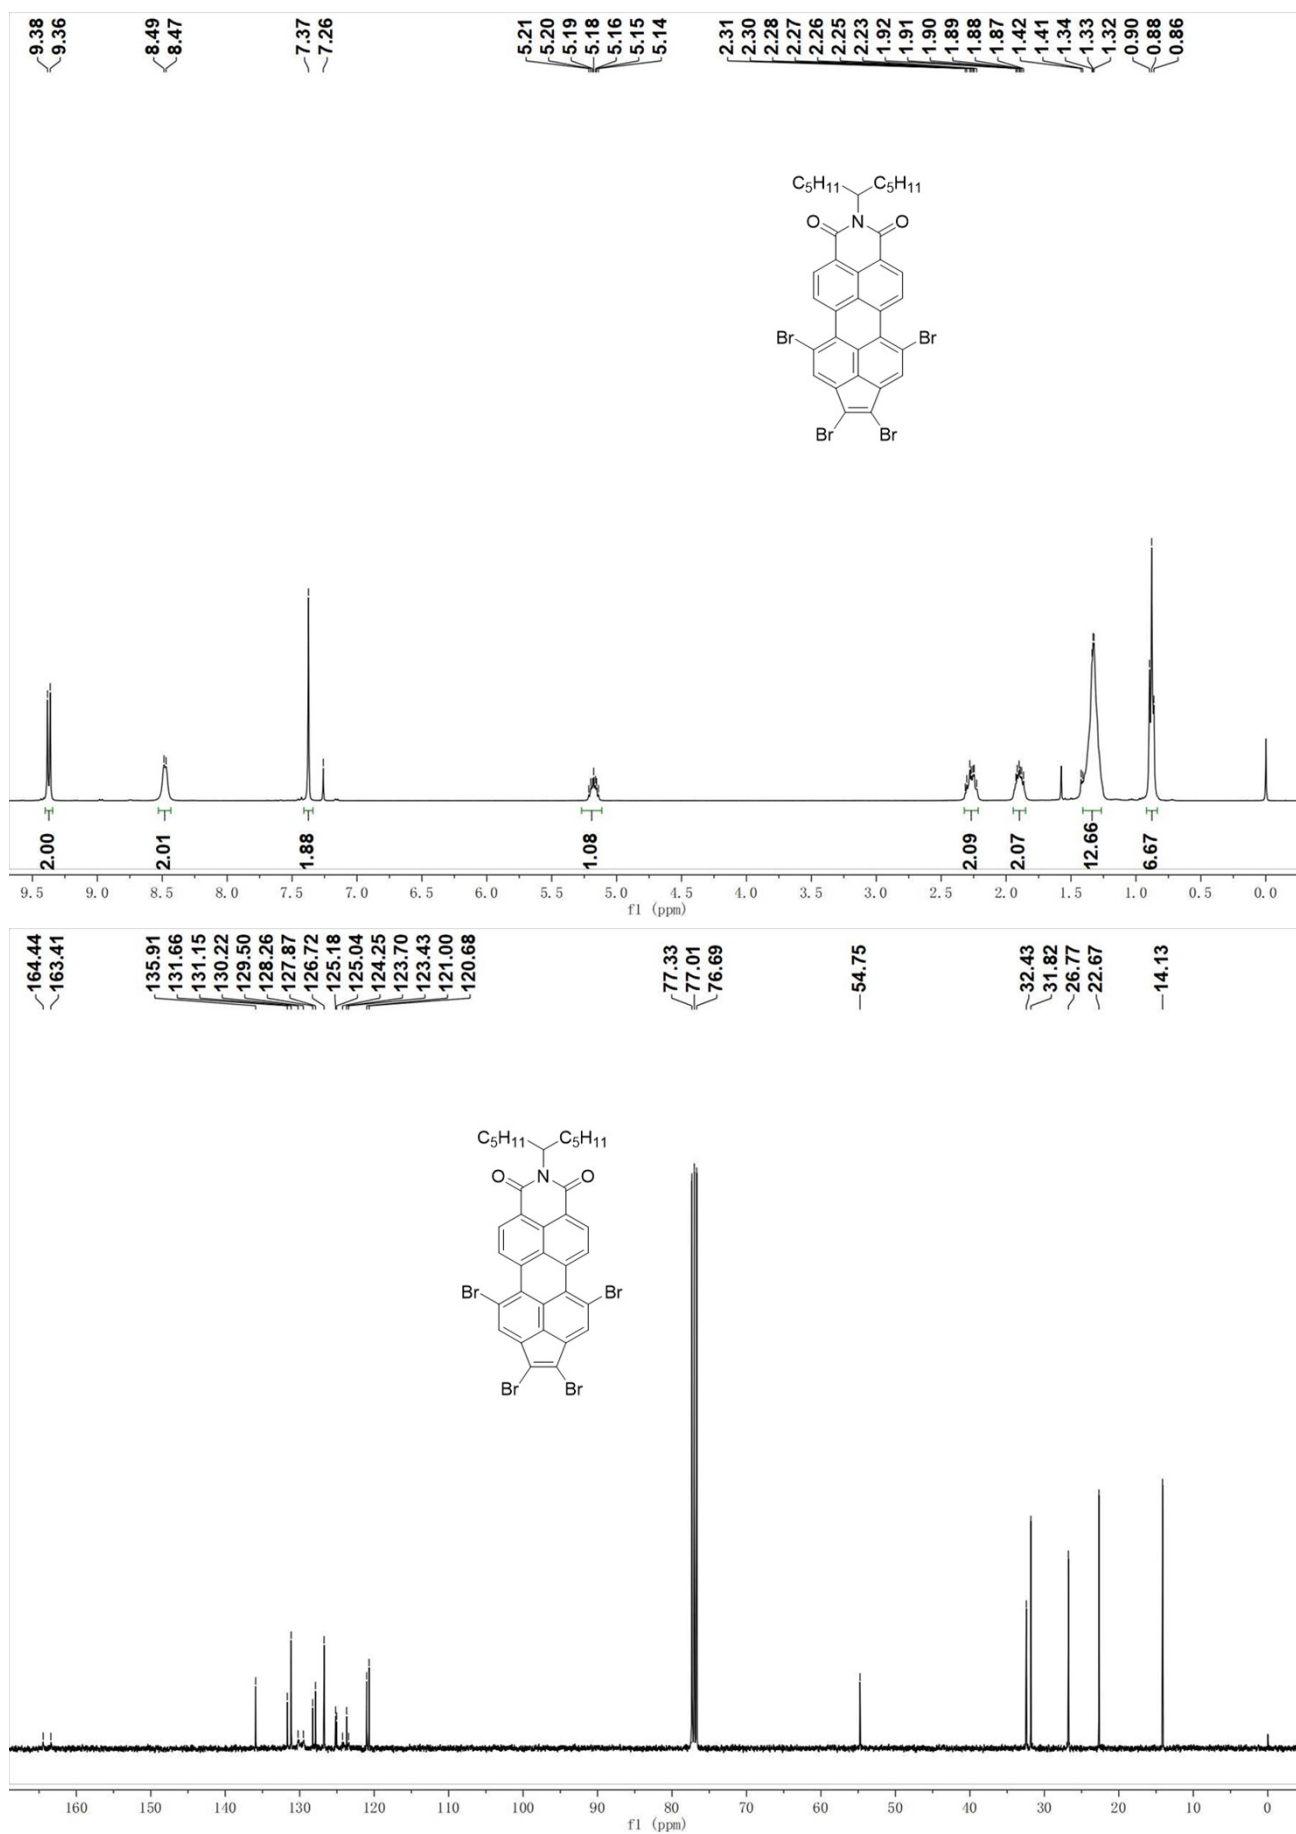

**Fig. S11** <sup>1</sup>H NMR and <sup>13</sup>C NMR spectra of **3a** in CDCl<sub>3</sub> (400 MHz, 298 K).

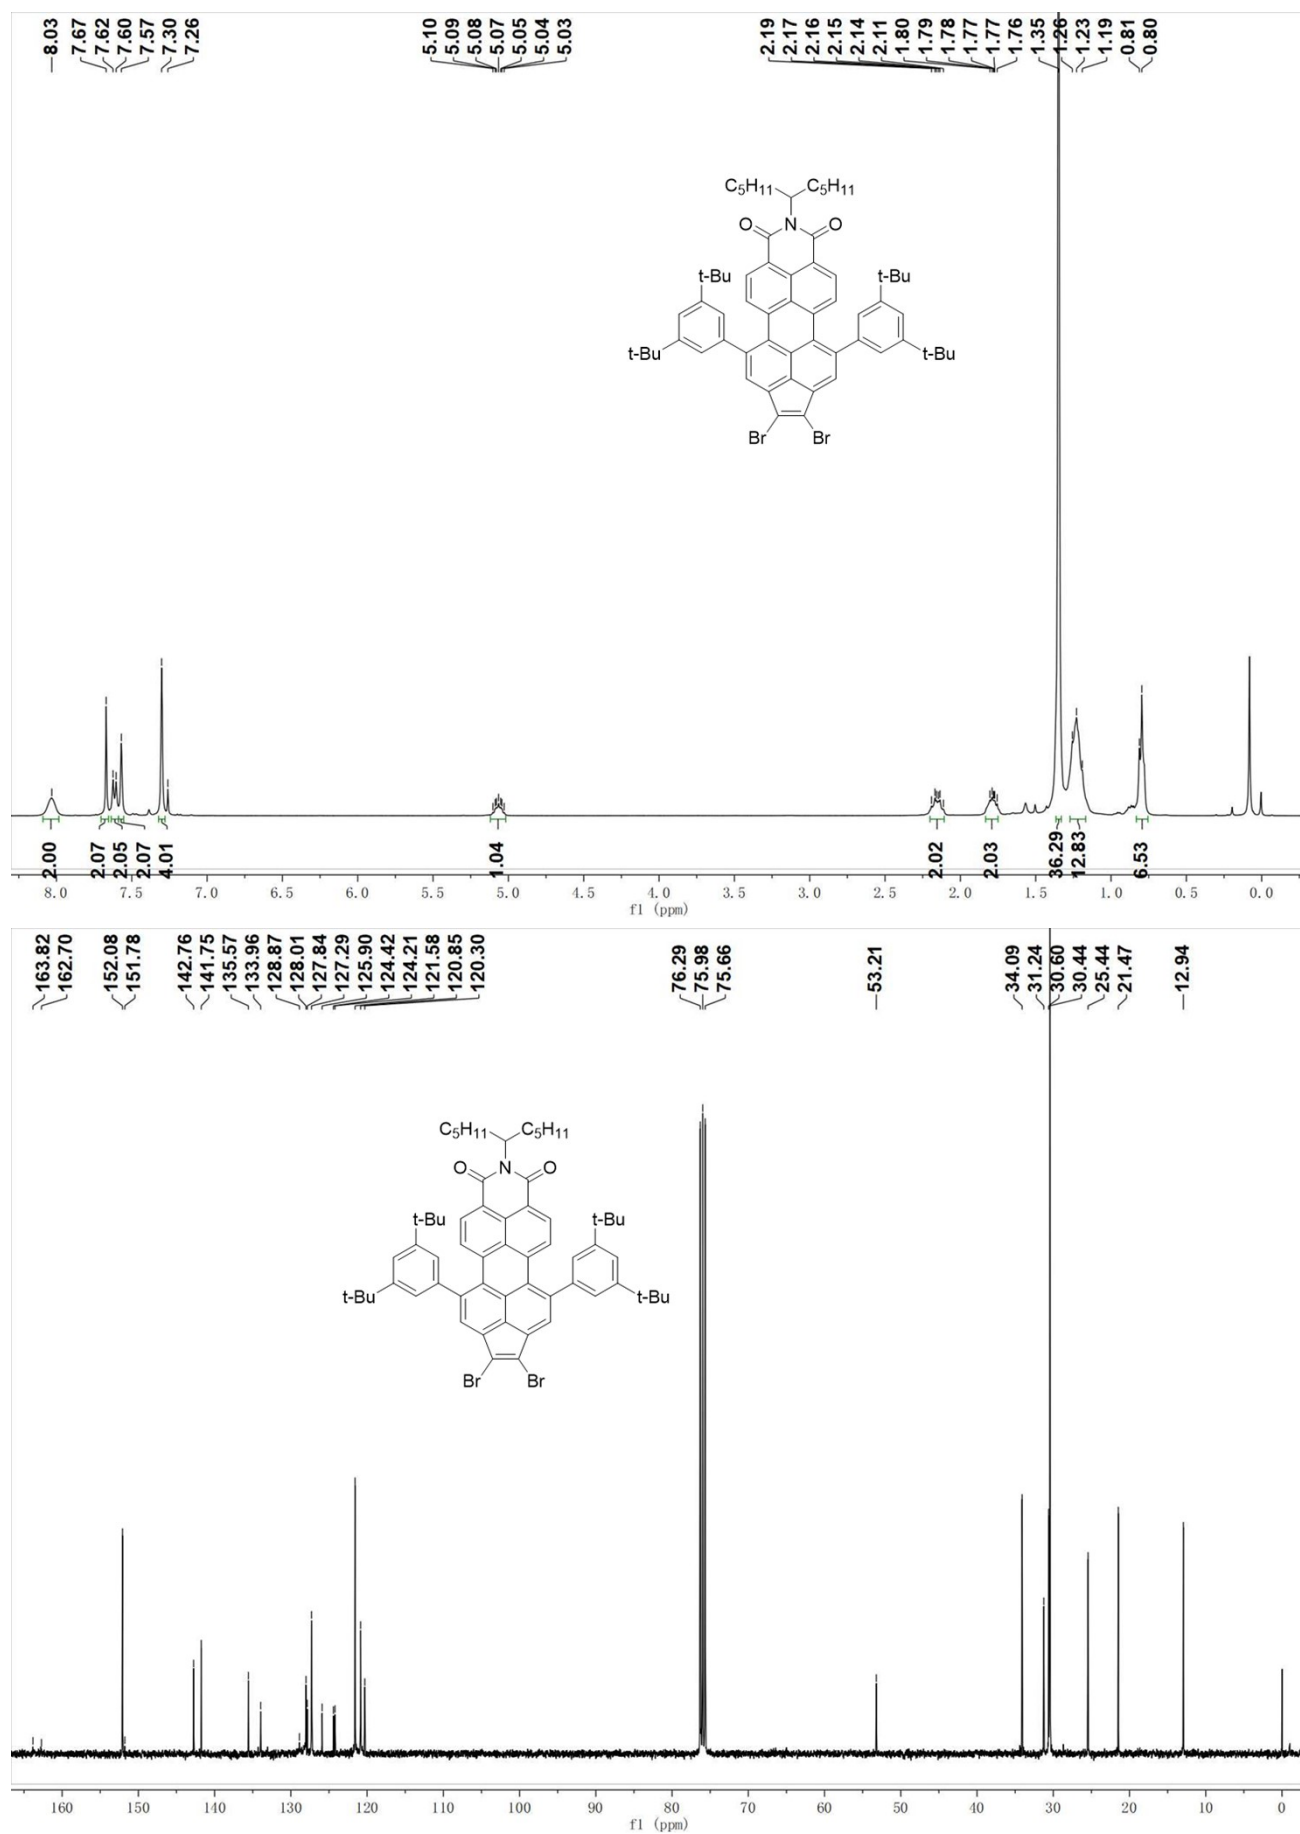

**Fig. S12** <sup>1</sup>H NMR and <sup>13</sup>C NMR spectra of **4a** in CDCl<sub>3</sub> (400 MHz, 298 K).

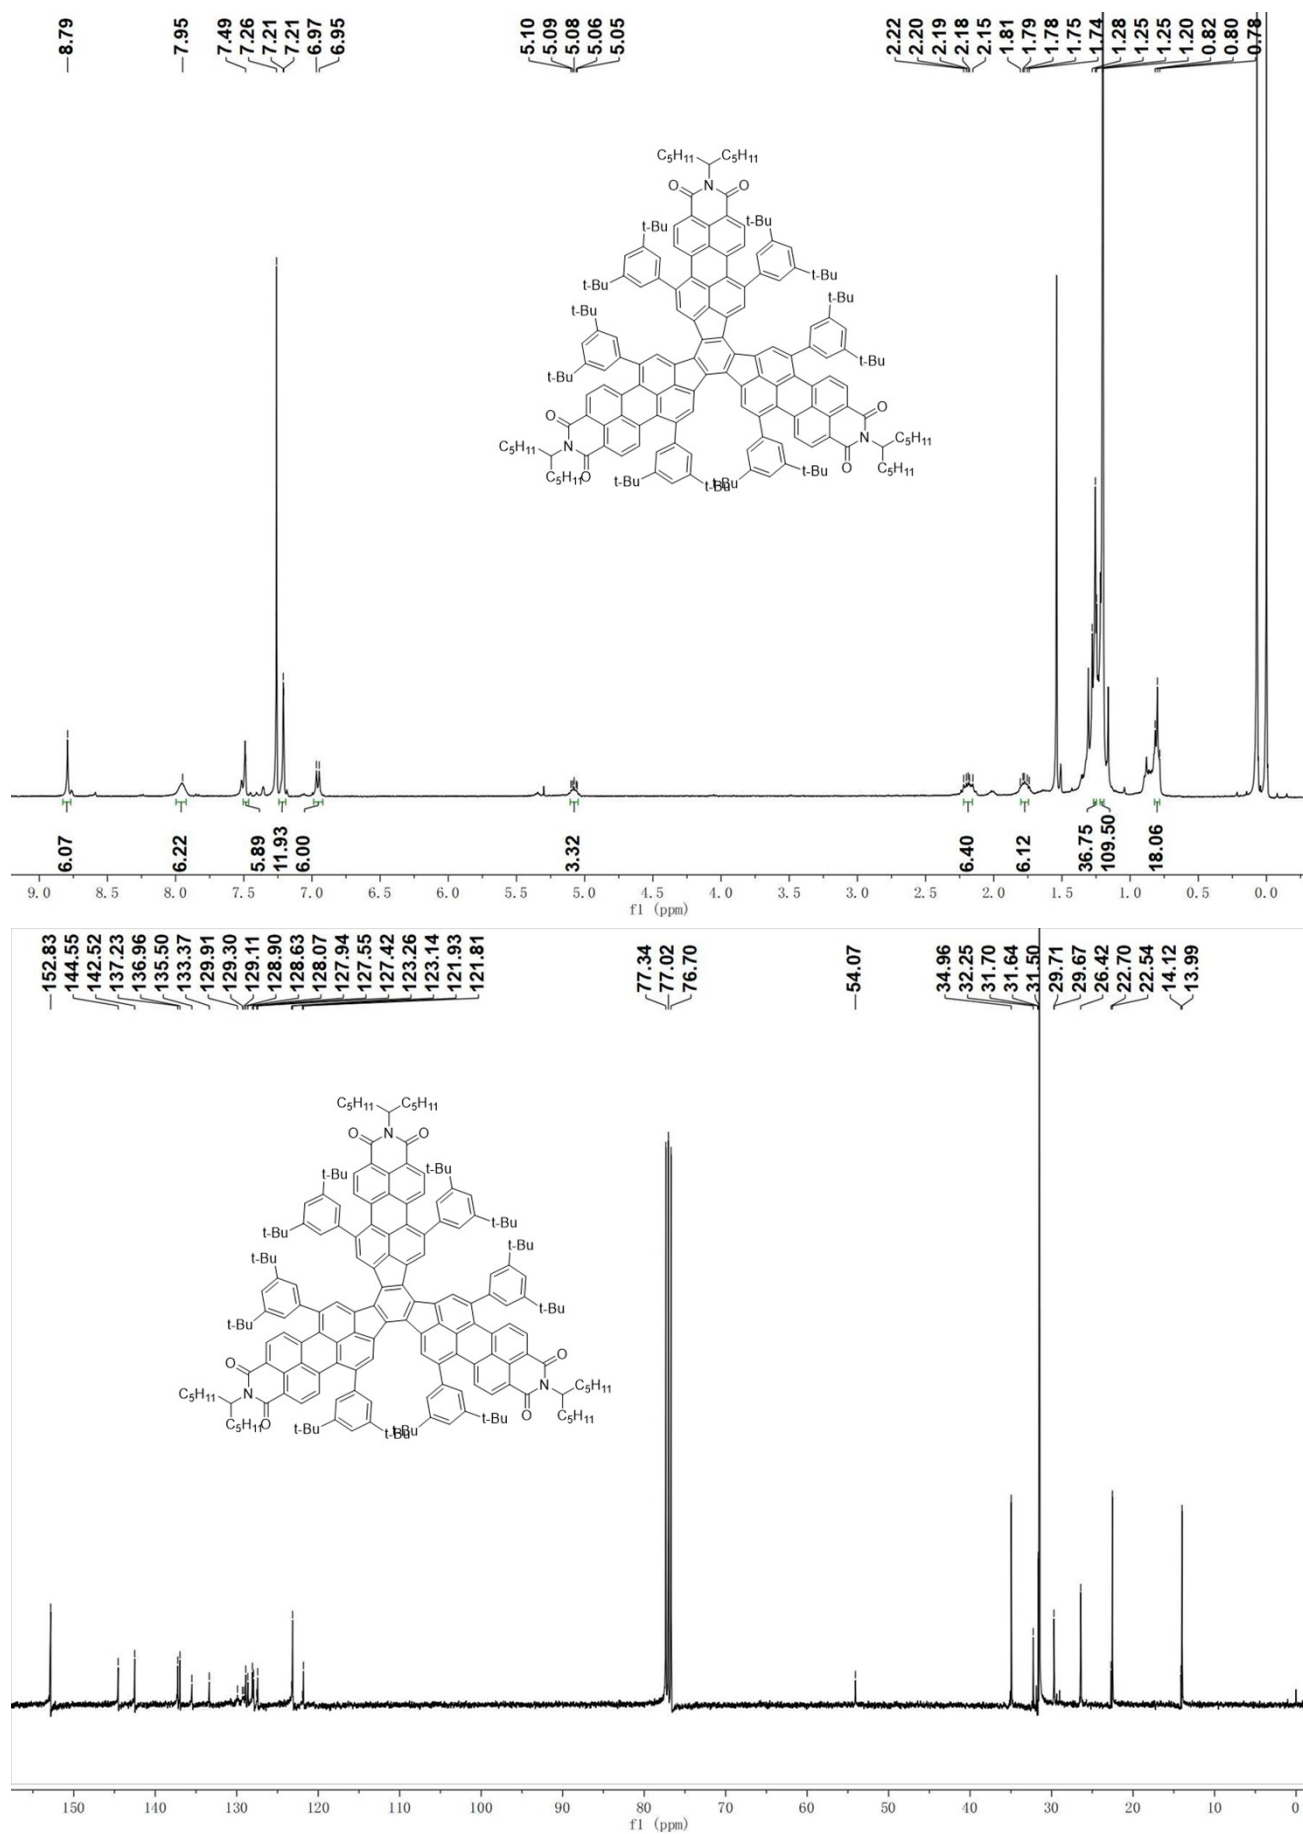

**Fig. S13** <sup>1</sup>H NMR and <sup>13</sup>C NMR spectra of **5a** in CDCl<sub>3</sub> (400 MHz, 298 K).

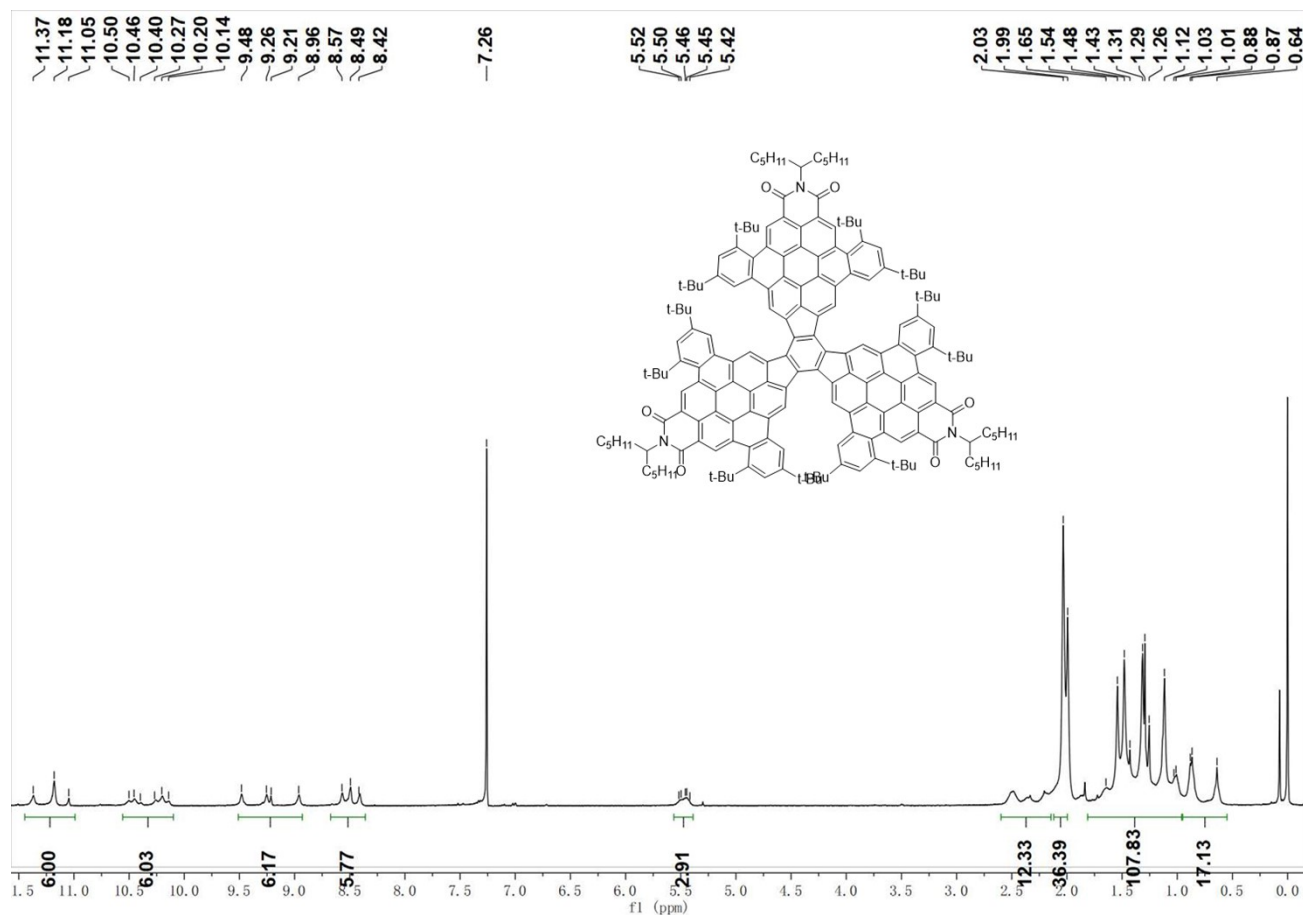

**Fig. S14** <sup>1</sup>H NMR spectrum of **6a** in CDCl<sub>3</sub> (400 MHz, 298 K).

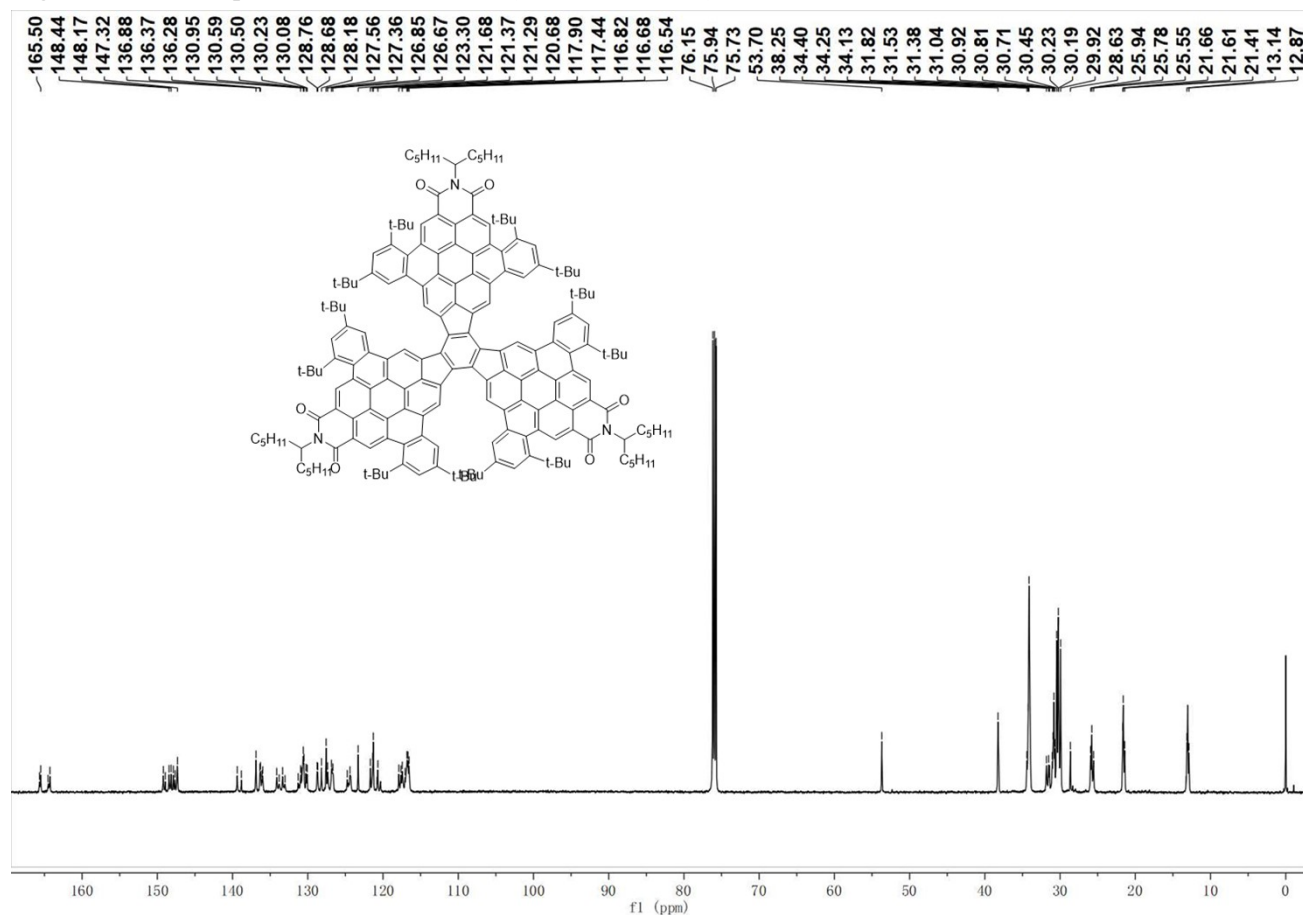

**Fig. S15** <sup>13</sup>C NMR spectrum of **6a** in CDCl<sub>3</sub> (600 MHz, 298 K).

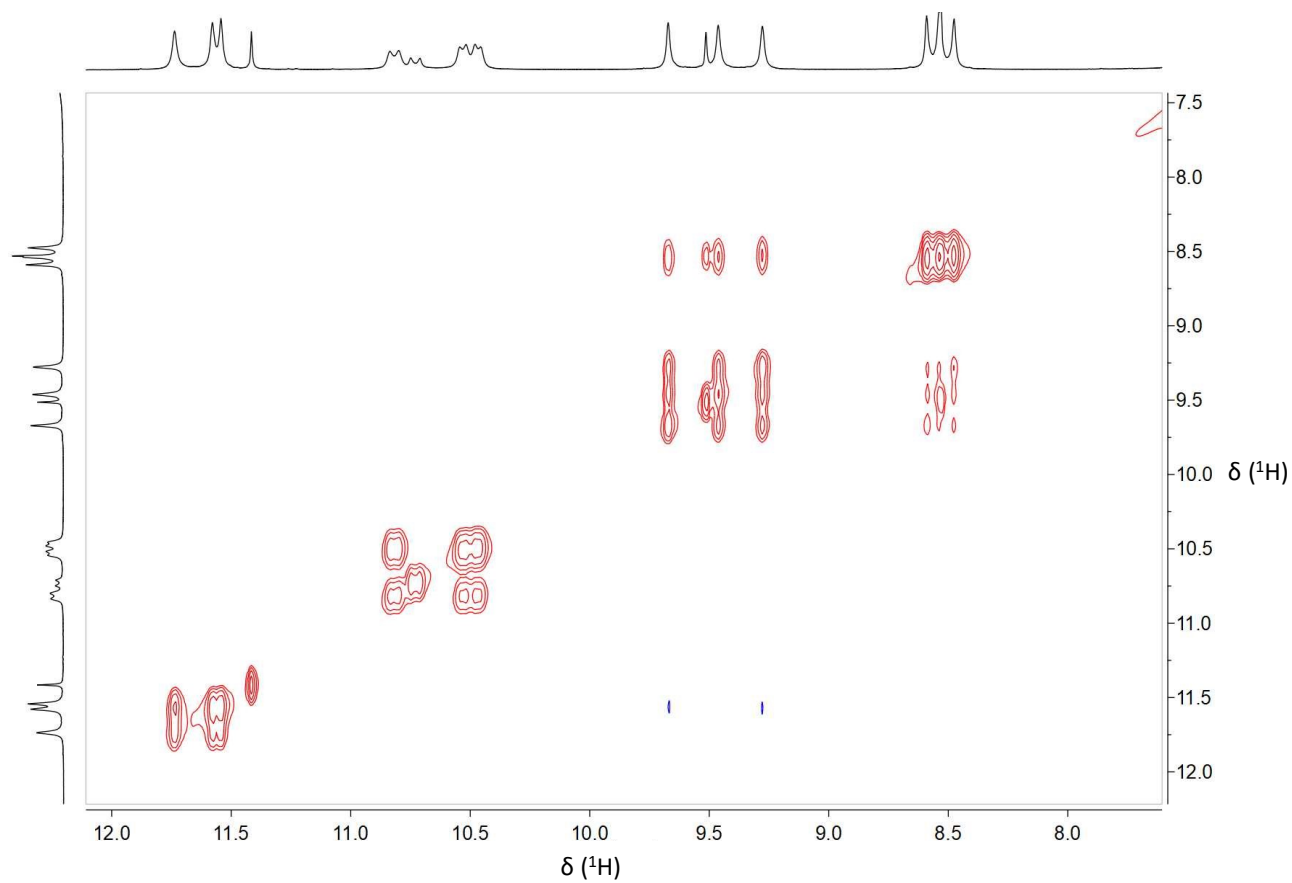

**Fig. S16** TOCSY spectrum of **6a** in  $\text{C}_6\text{D}_6$  (600 MHz, 298 K).

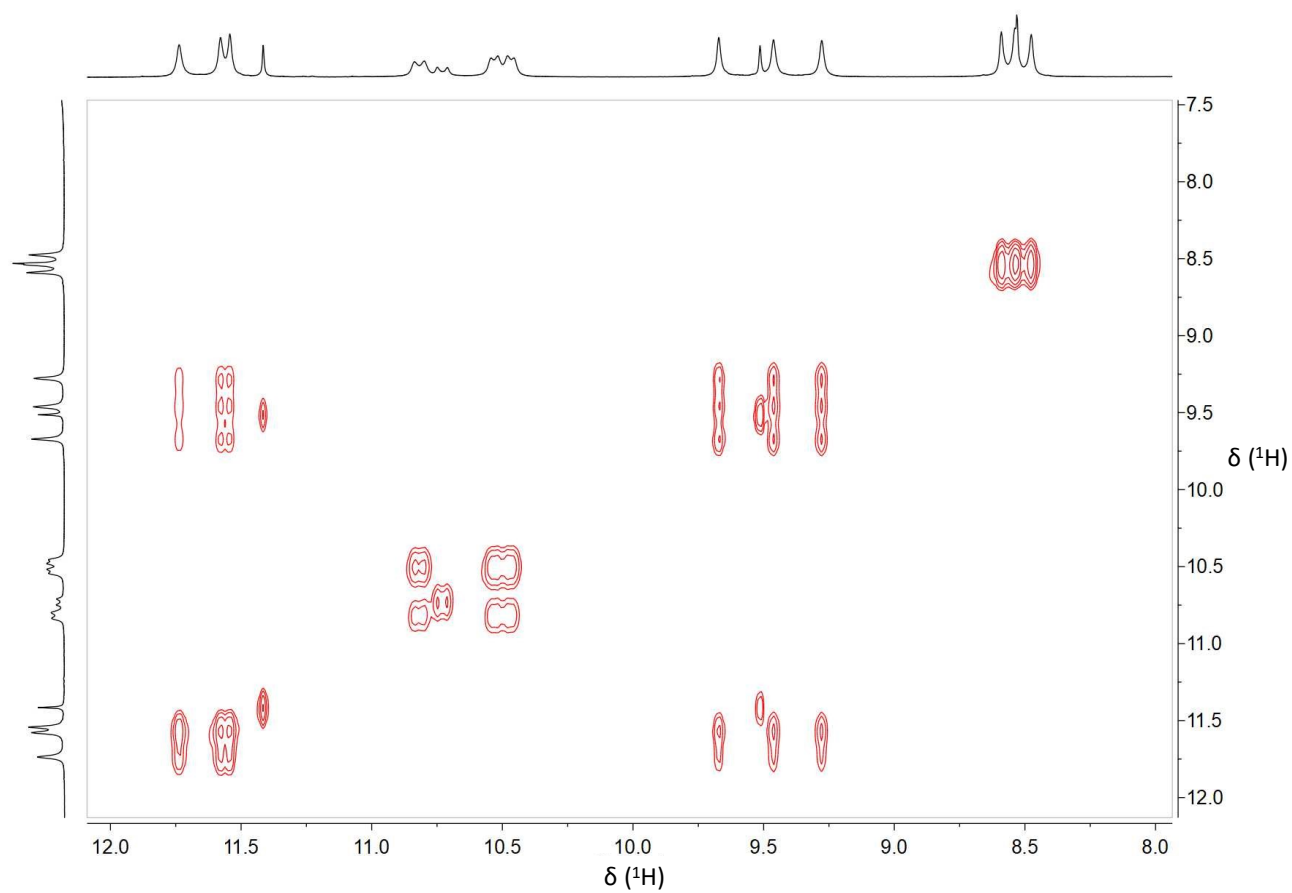

**Fig. S17** NOESY spectrum of **6a** in  $\text{C}_6\text{D}_6$  (600MHz, 298K).

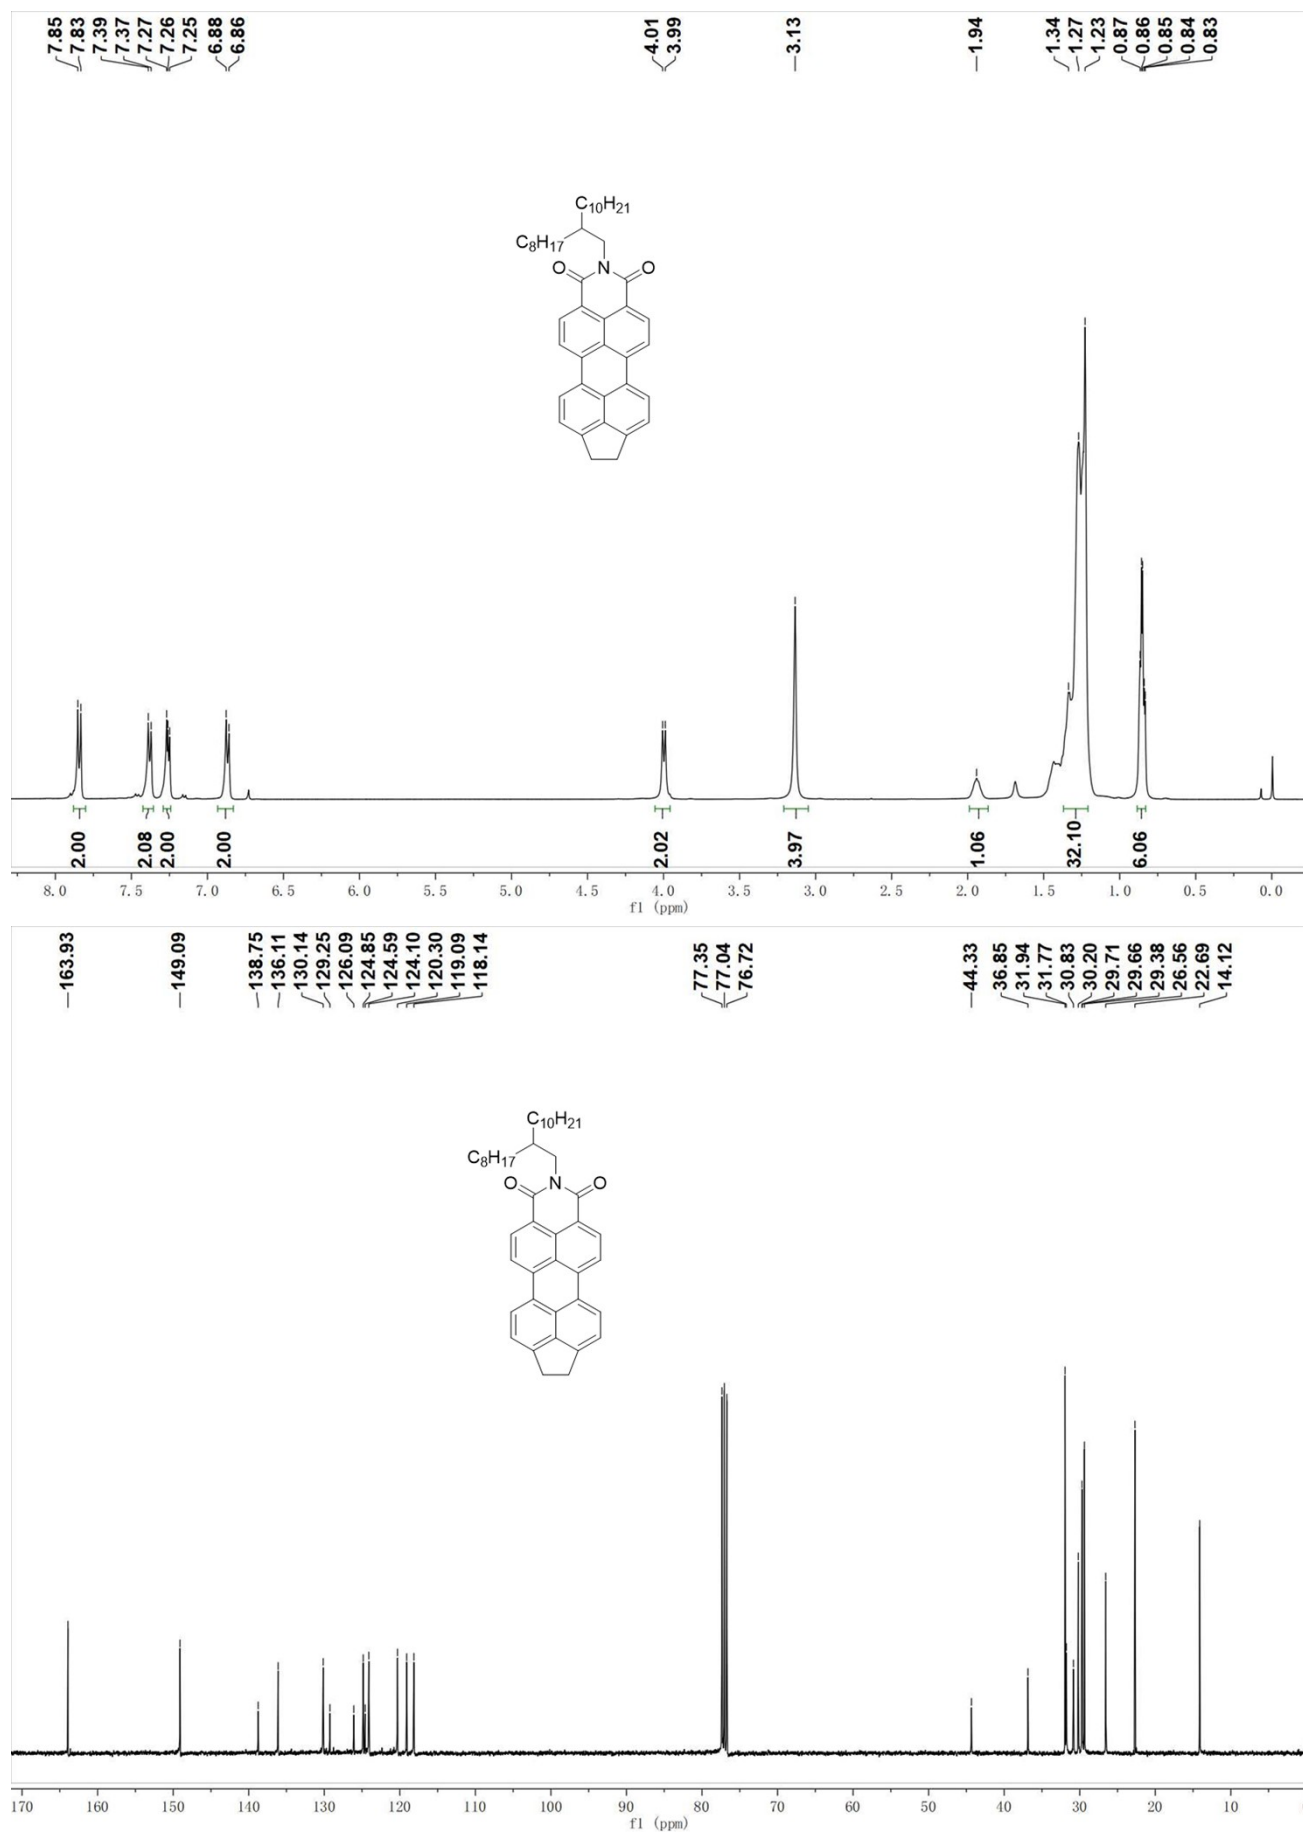

**Fig. S18** <sup>1</sup>H NMR and <sup>13</sup>C NMR spectra of **1b** in CDCl<sub>3</sub> (400 MHz, 298 K).

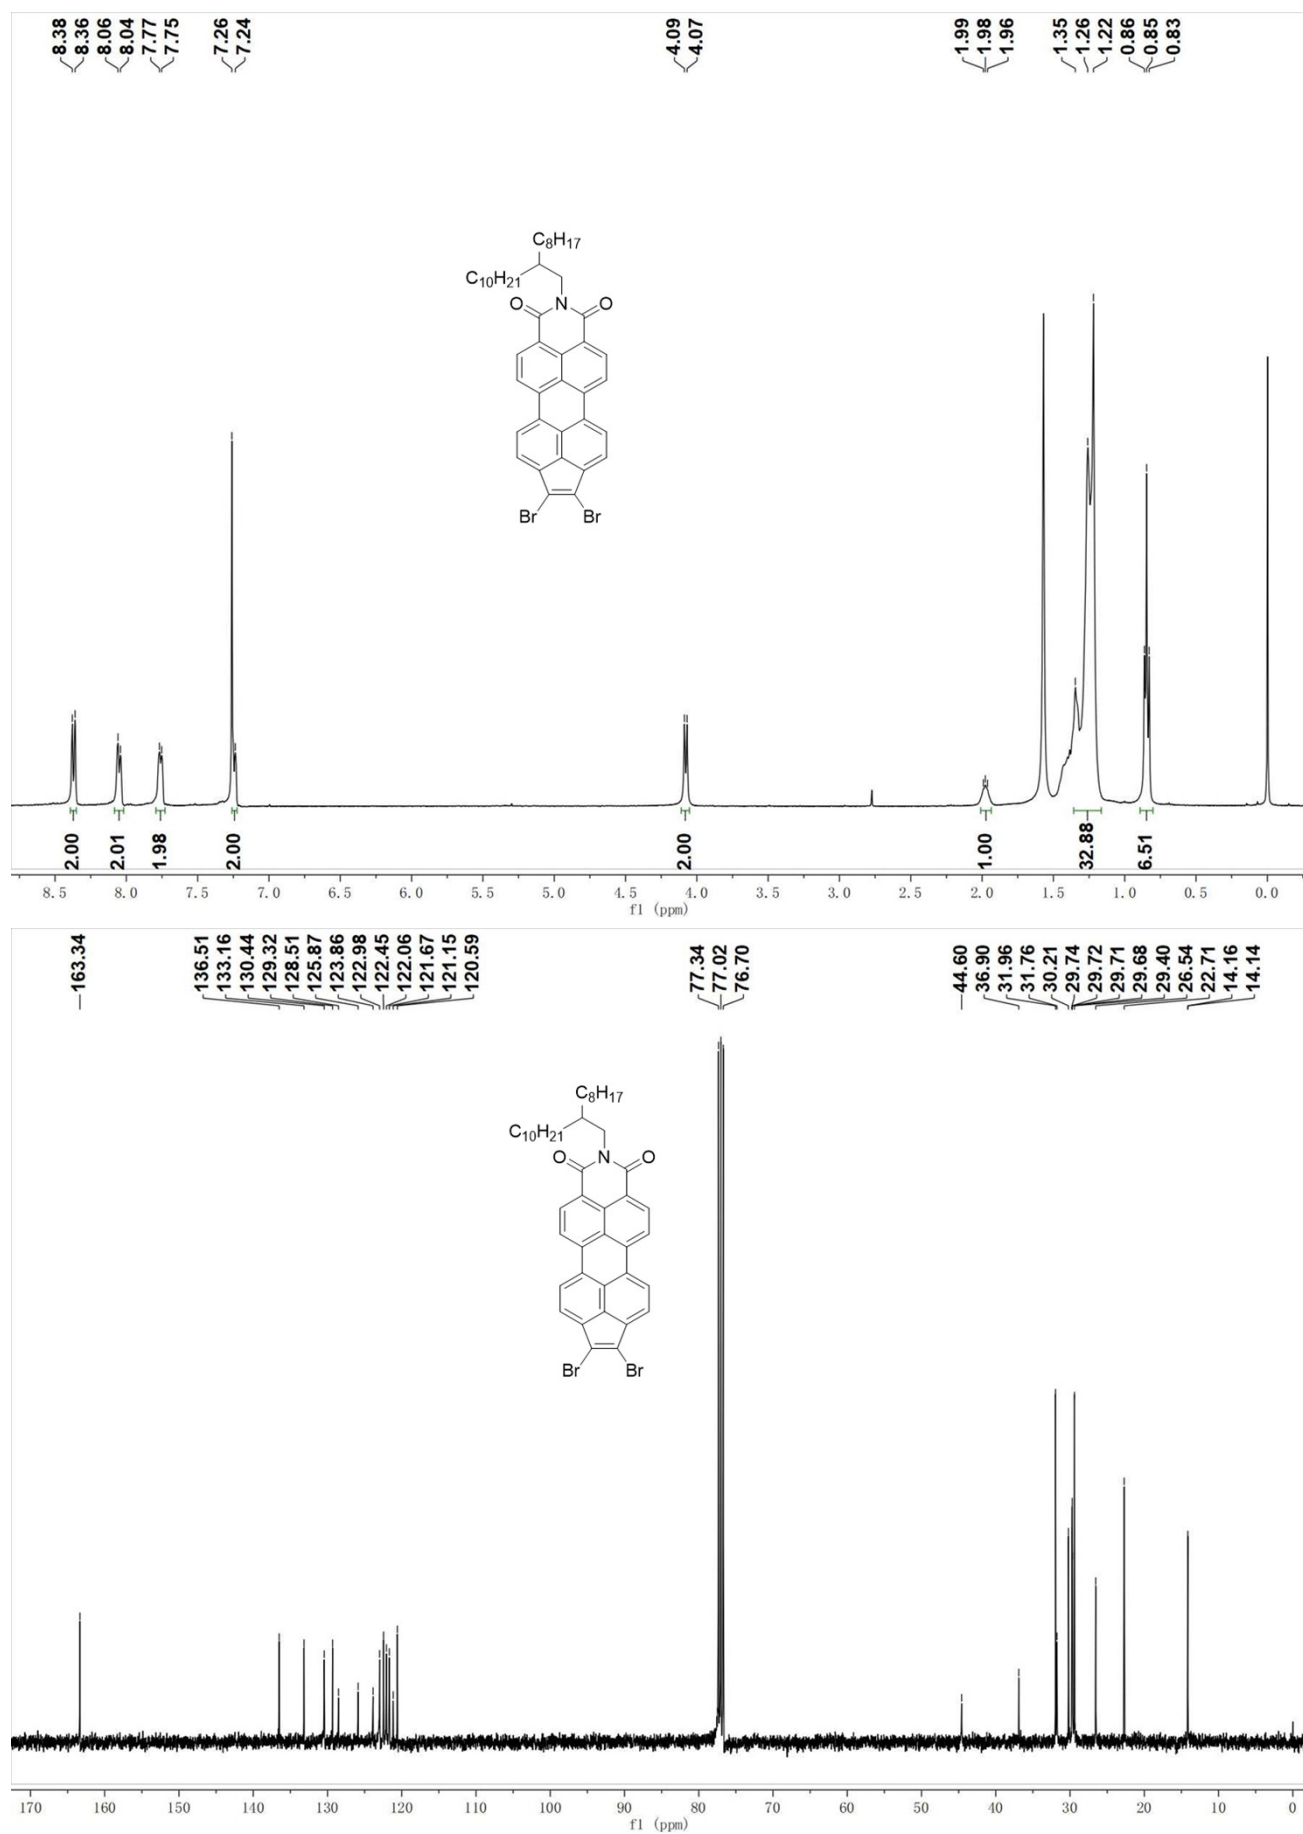

**Fig. S19** <sup>1</sup>H NMR and <sup>13</sup>C NMR spectra of **2b** in CDCl<sub>3</sub> (400 MHz, 298 K).

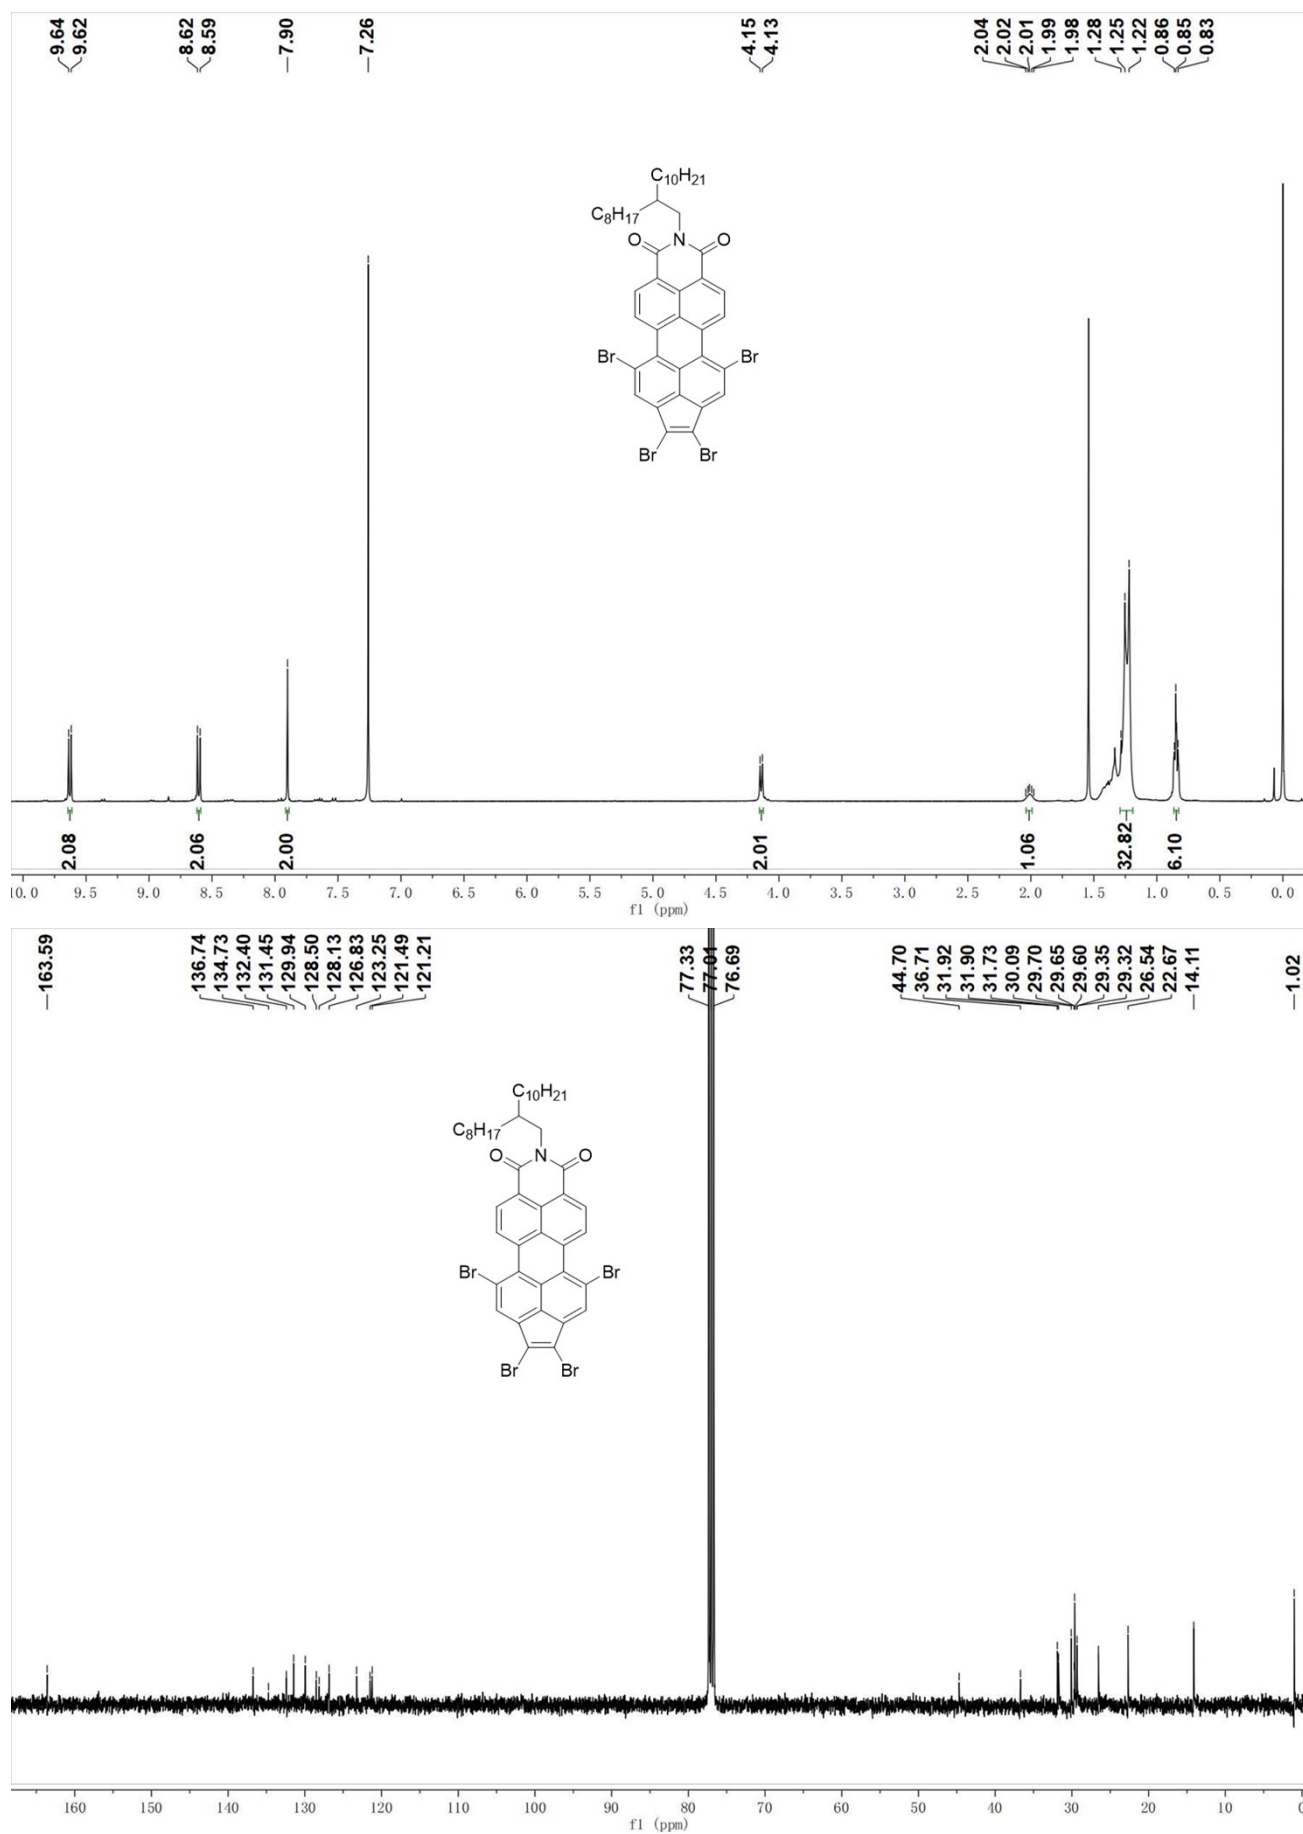

**Fig. S20** <sup>1</sup>H NMR and <sup>13</sup>C NMR spectra of **3b** in CDCl<sub>3</sub> (400 MHz, 298 K).

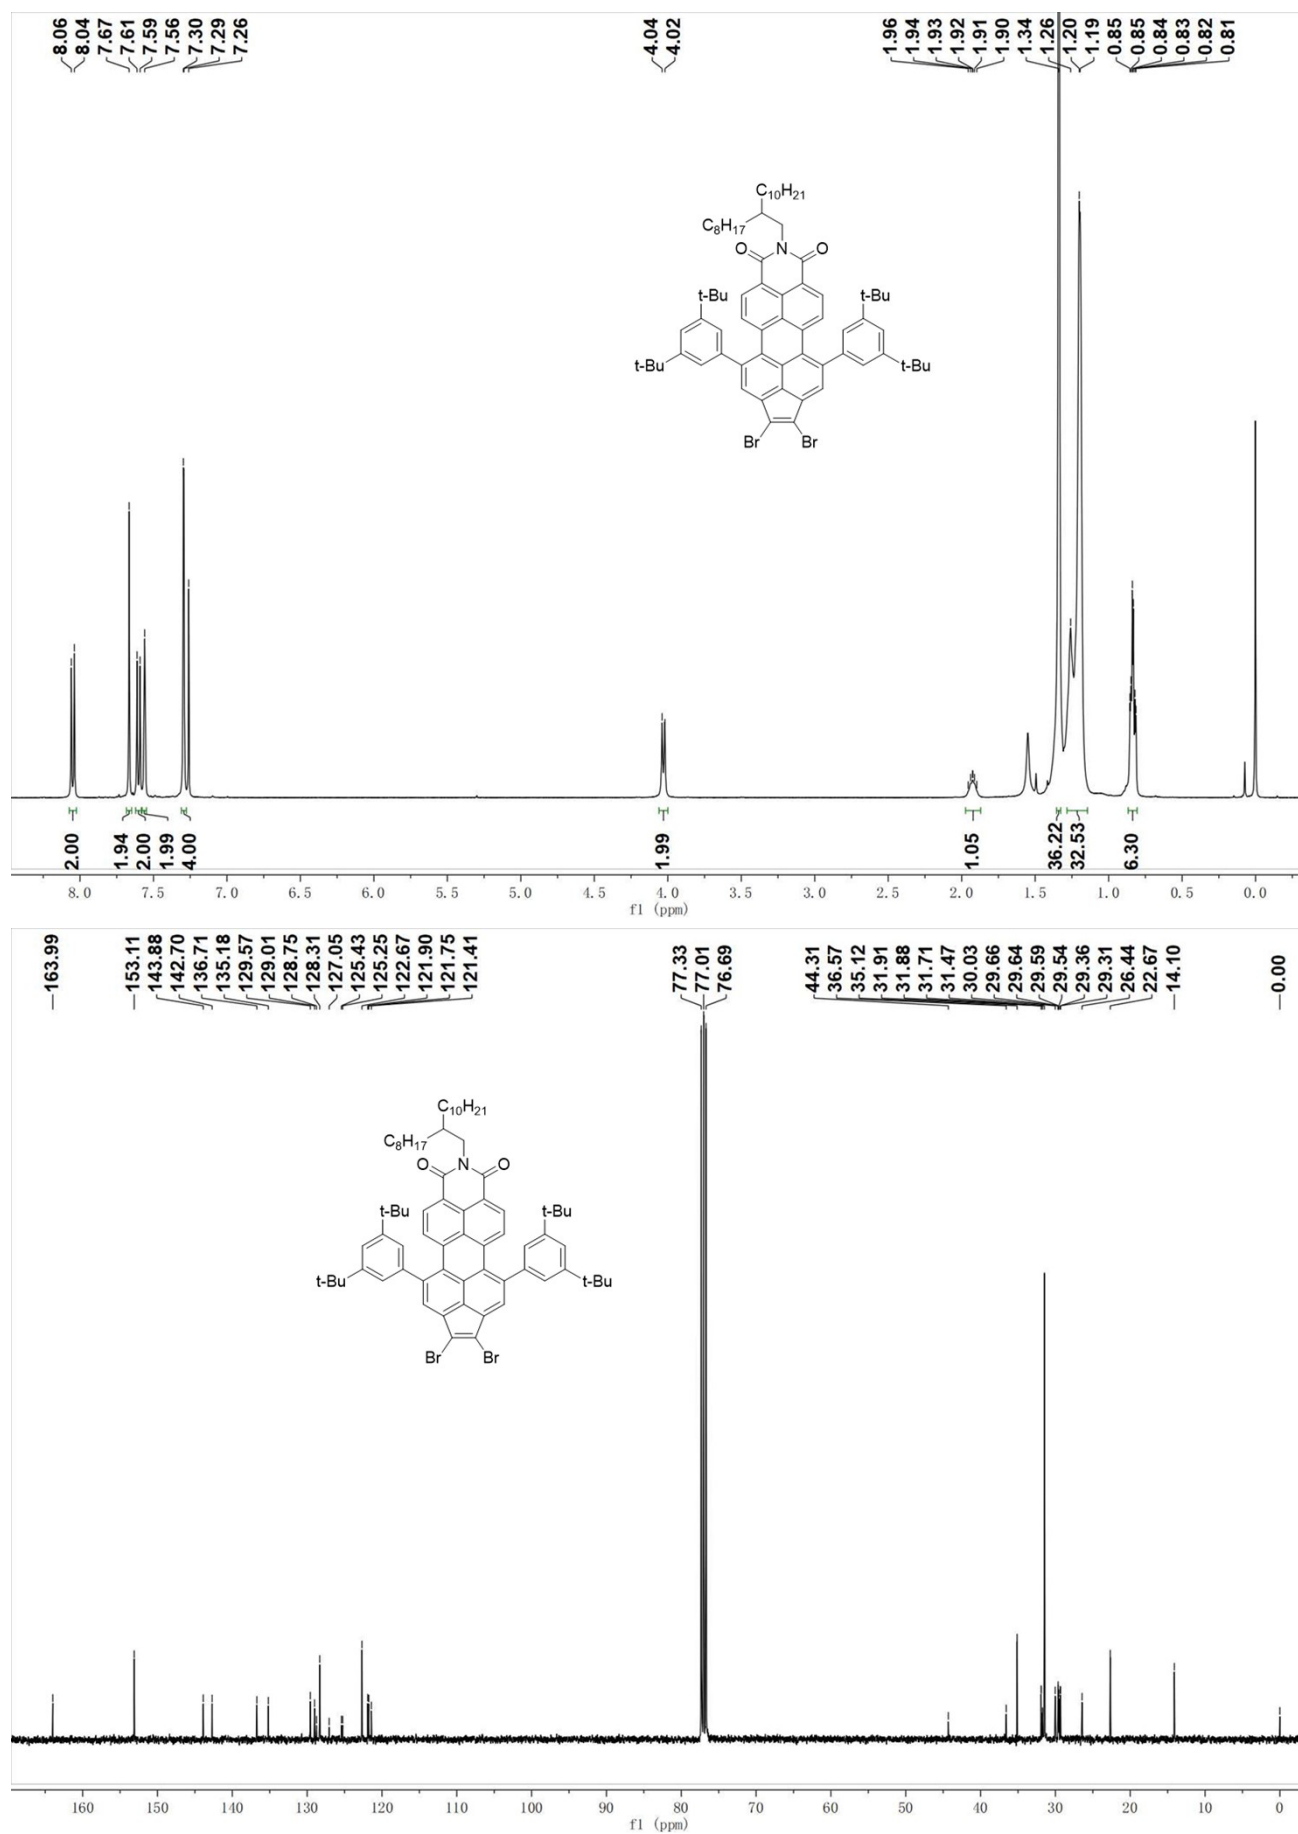

**Fig. S21** <sup>1</sup>H NMR and <sup>13</sup>C NMR spectra of **4b** in CDCl<sub>3</sub> (400 MHz, 298 K).

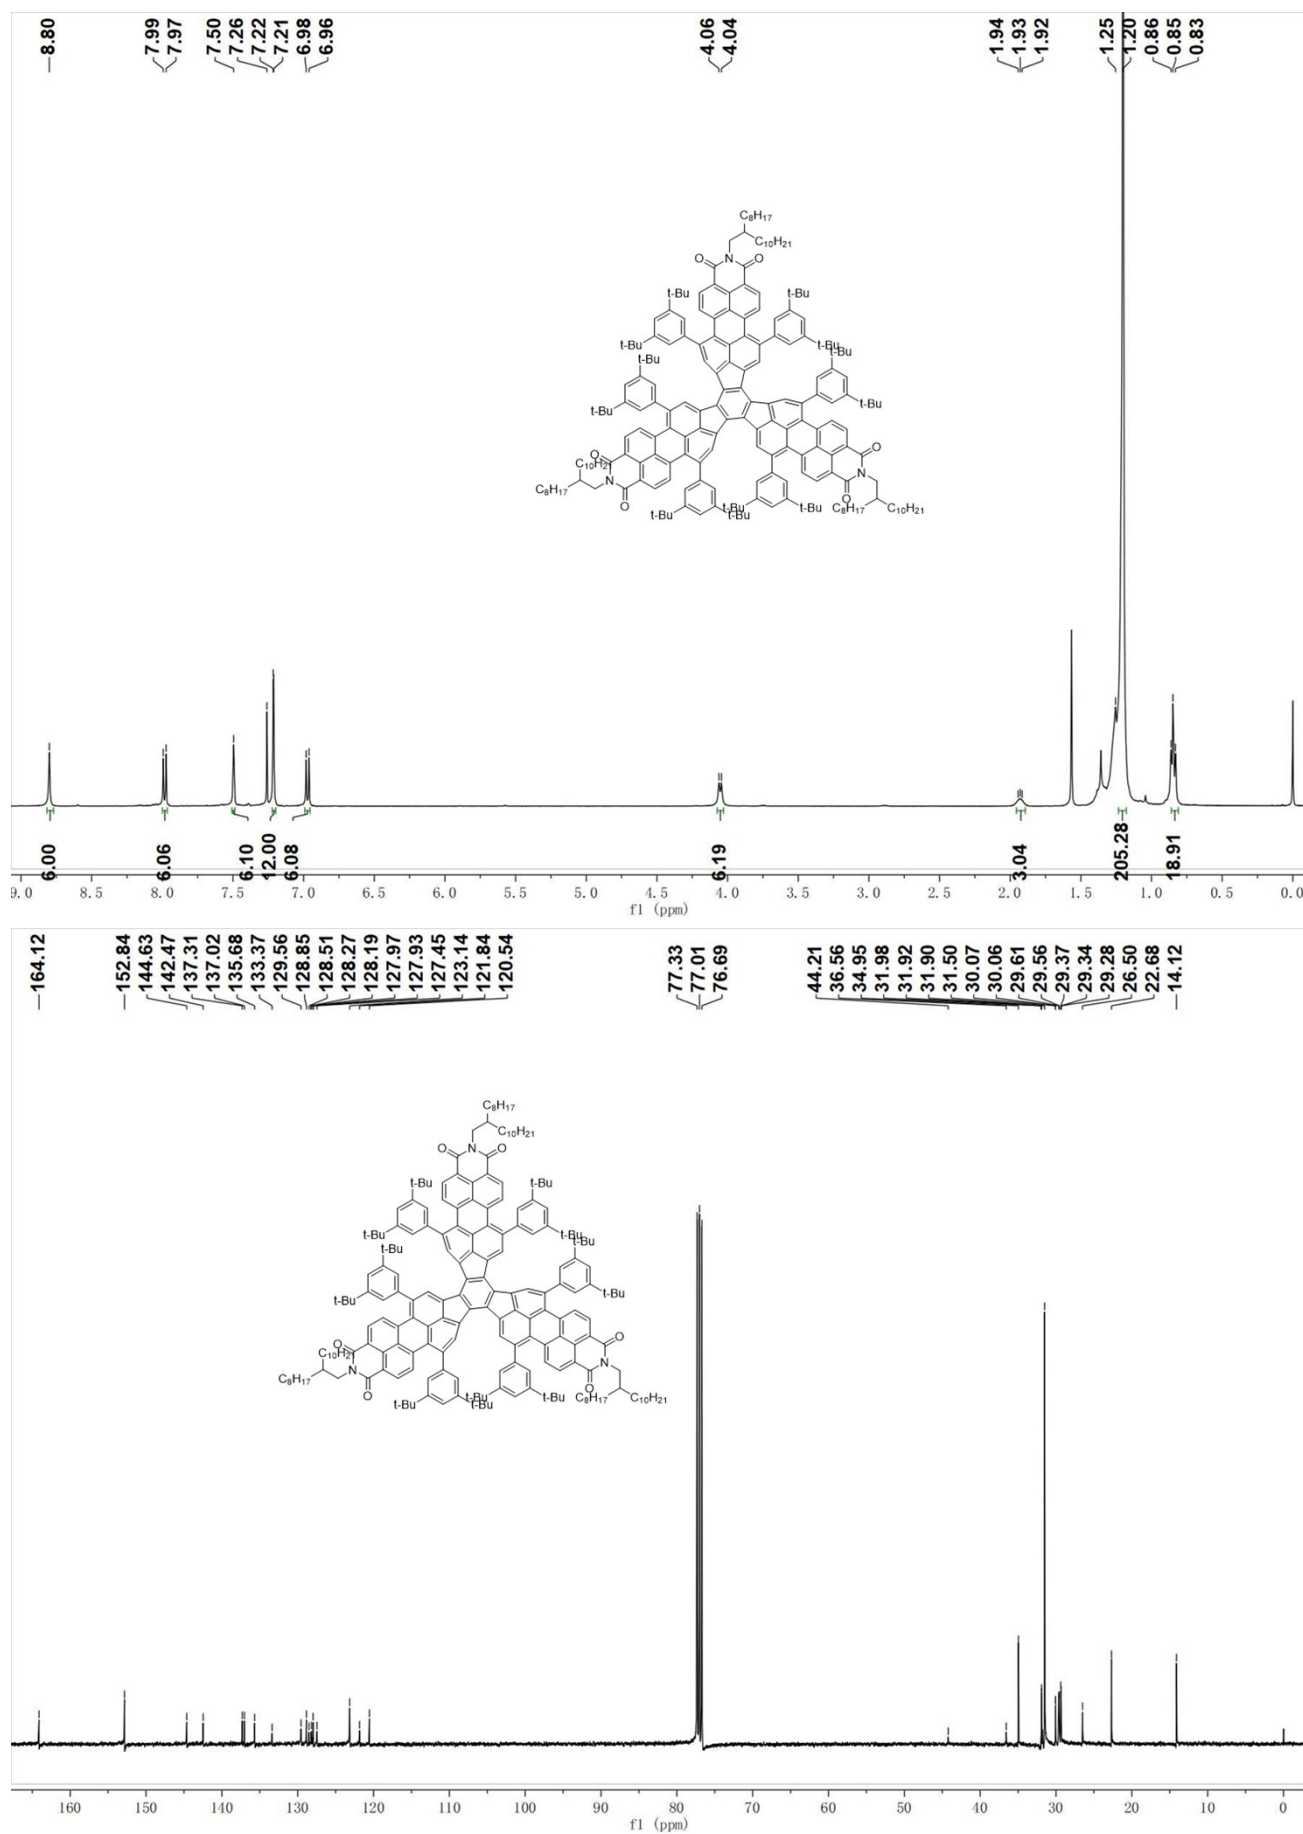

**Fig. S22** <sup>1</sup>H NMR and <sup>13</sup>C NMR spectra of **5b** in CDCl<sub>3</sub> (400 MHz, 298 K).

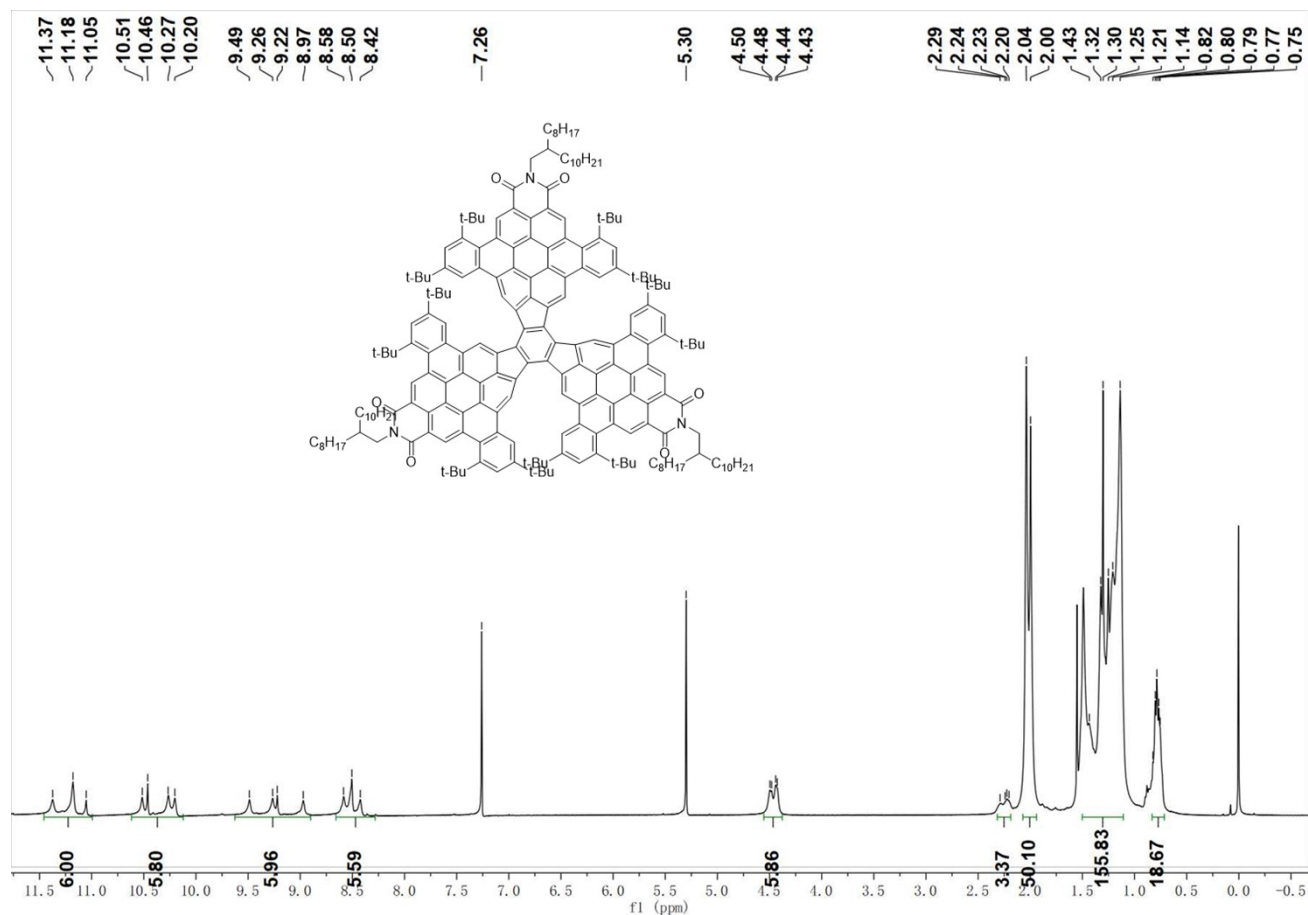

**Fig. S23** <sup>1</sup>H NMR spectrum of **6b** in CDCl<sub>3</sub> (400 MHz, 298 K).

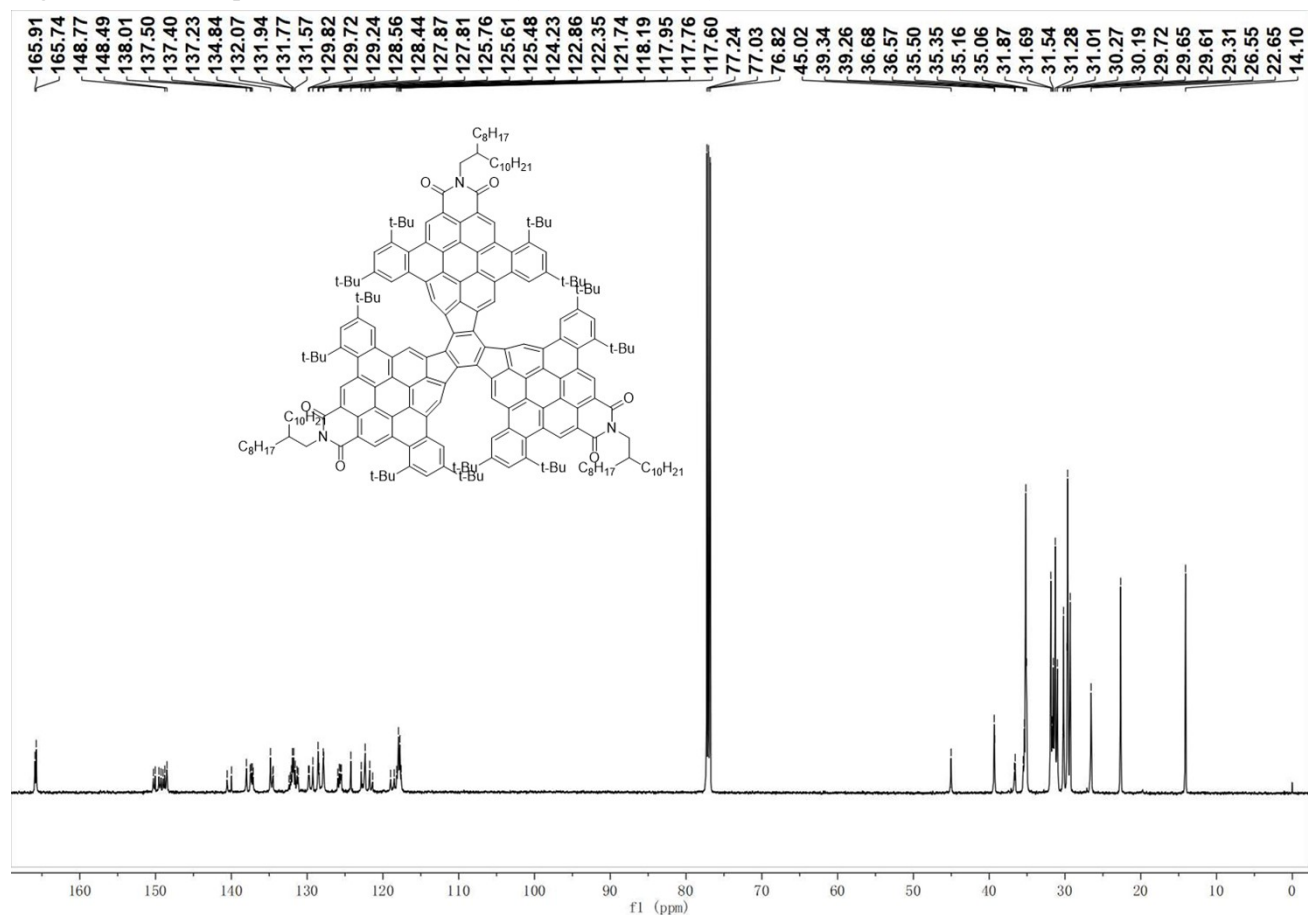

**Fig. S24** <sup>13</sup>C NMR spectrum of **6b** in CDCl<sub>3</sub> (600 MHz, 298 K).

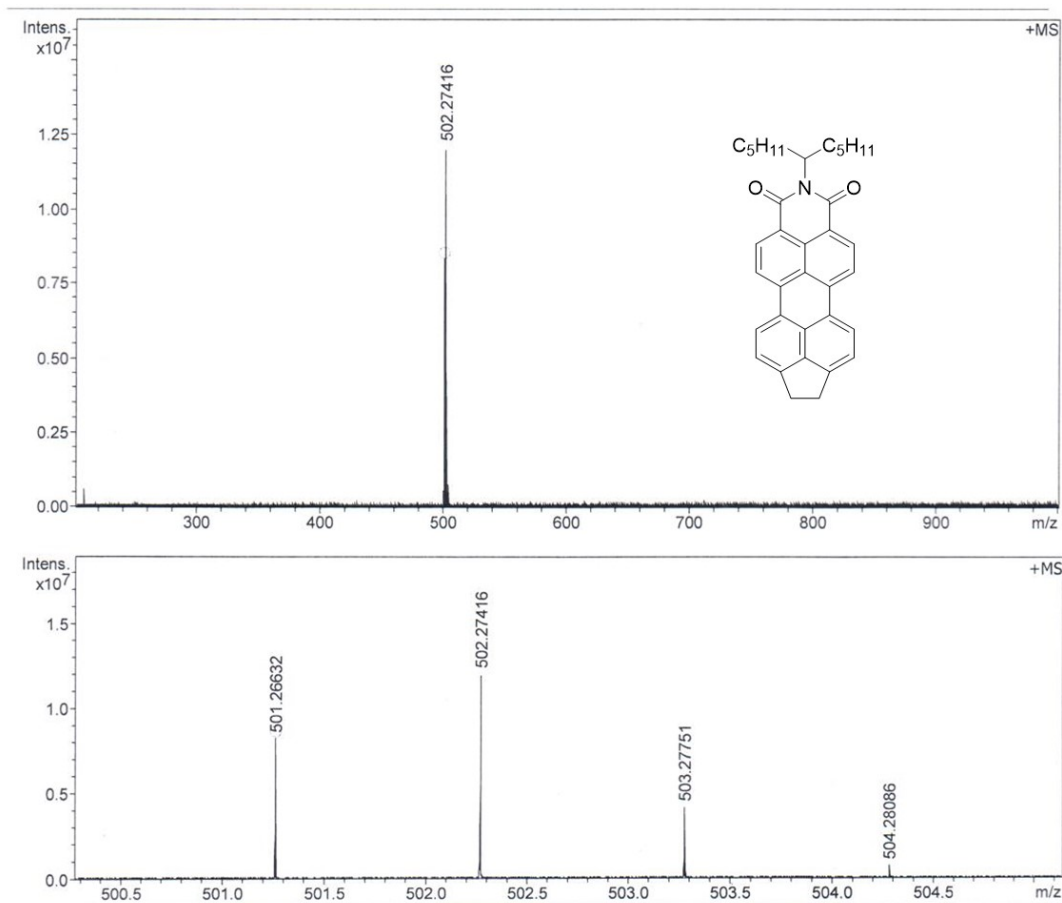

**Fig. S25** HR-MALDI-TOF spectrum of **1a**.

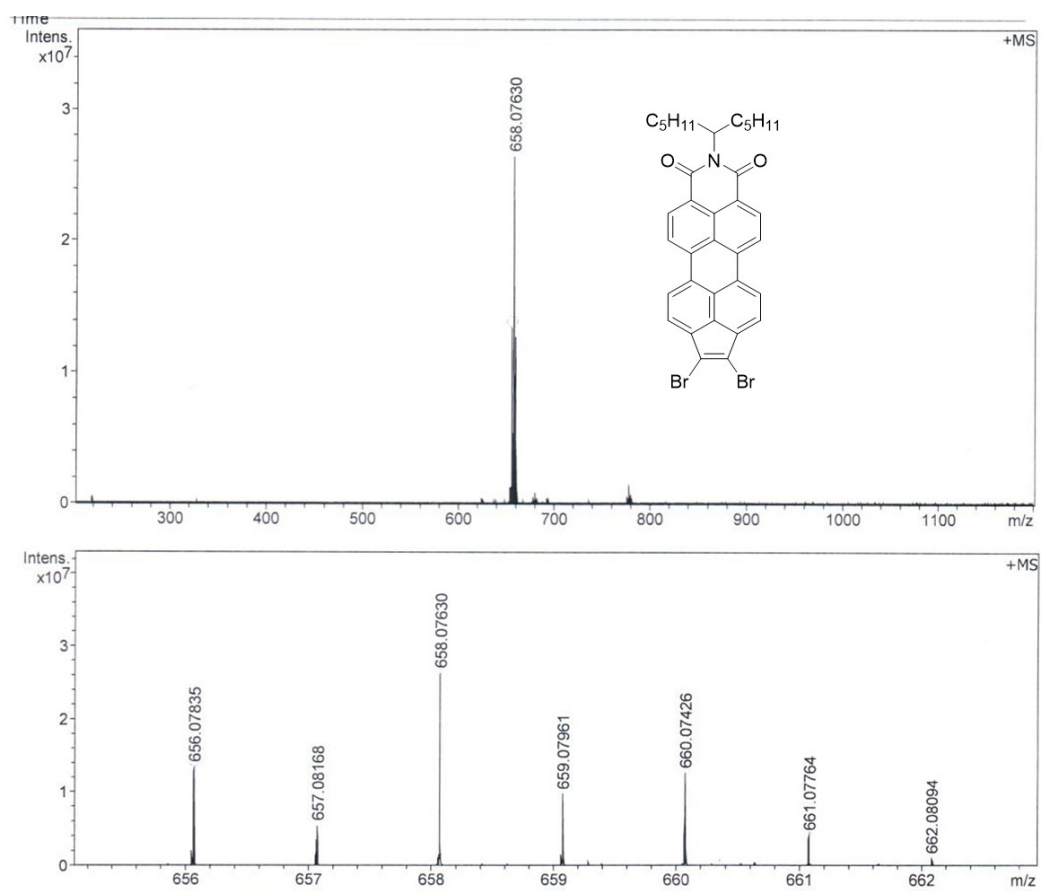

**Fig. S26** HR-MALDI-TOF spectrum of **2a**.

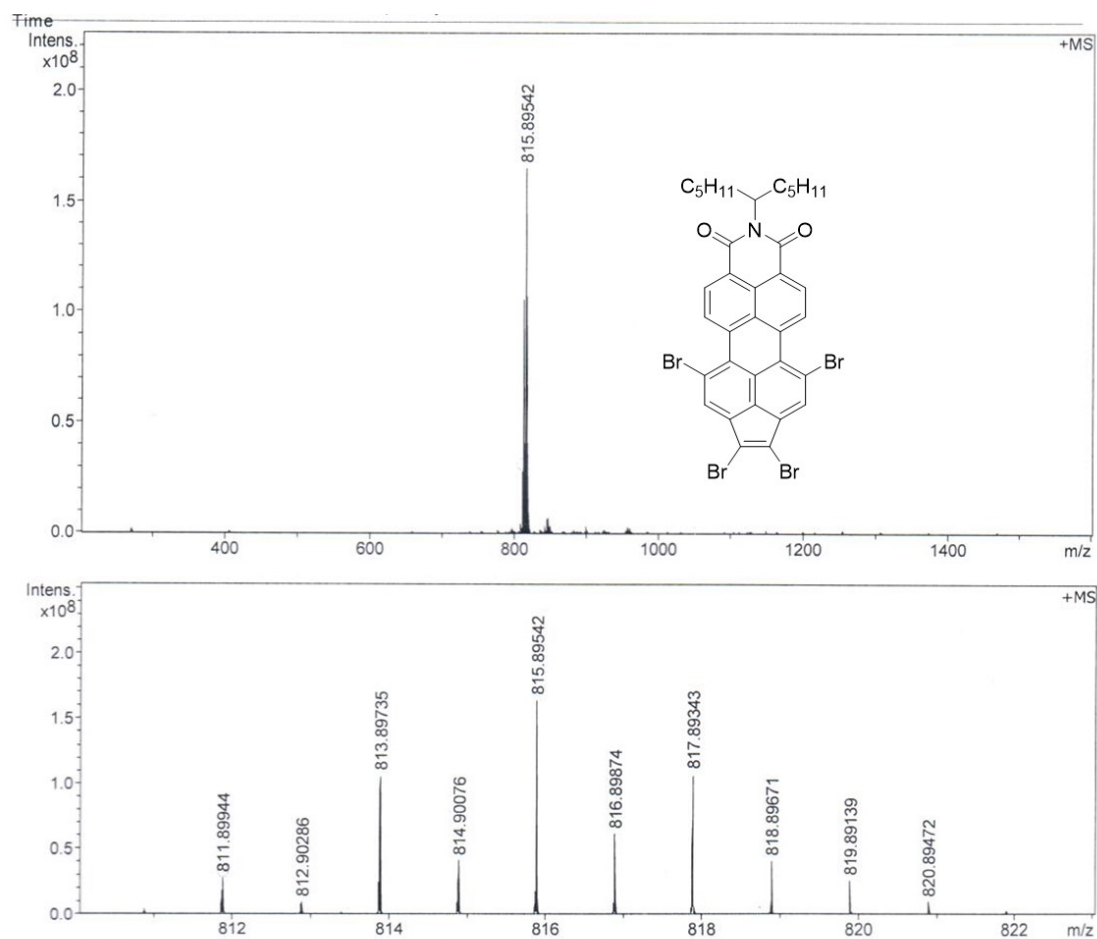

**Fig. S27** HR-MALDI-TOF spectrum of **3a**.

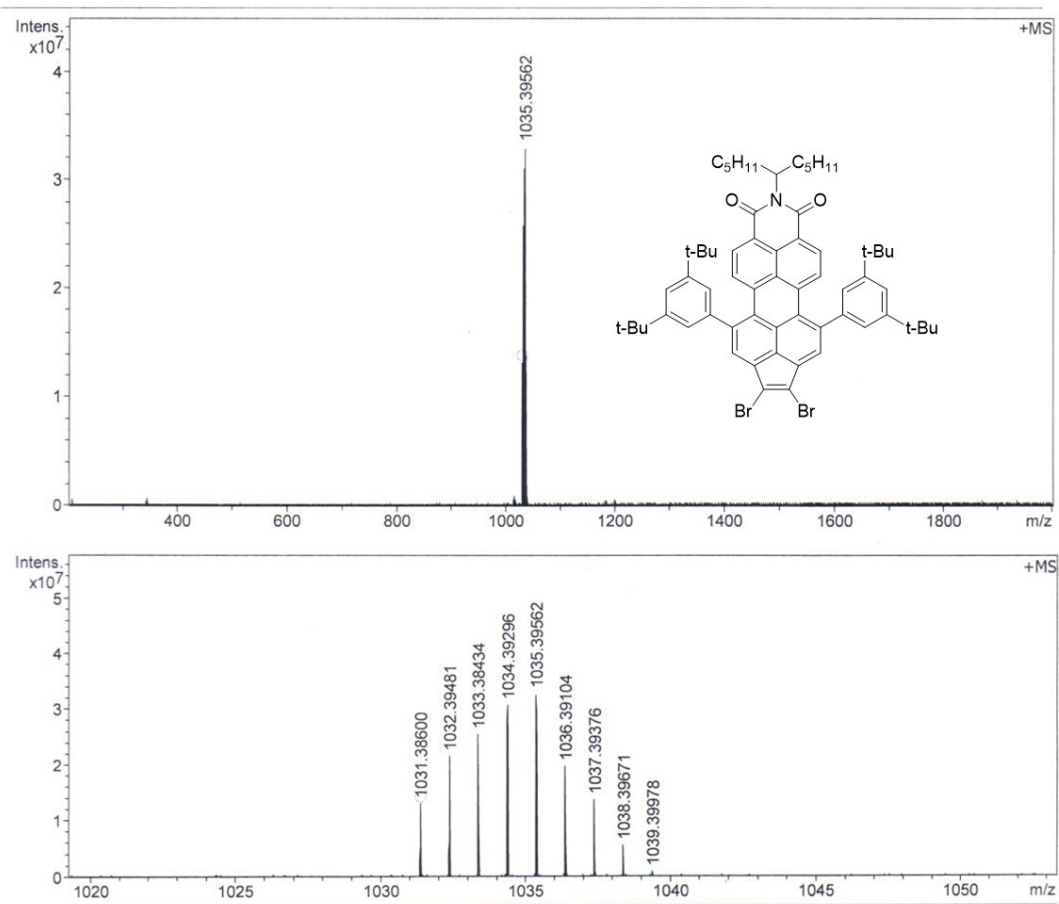

**Fig. S28** HR-MALDI-TOF spectrum of **4a**.

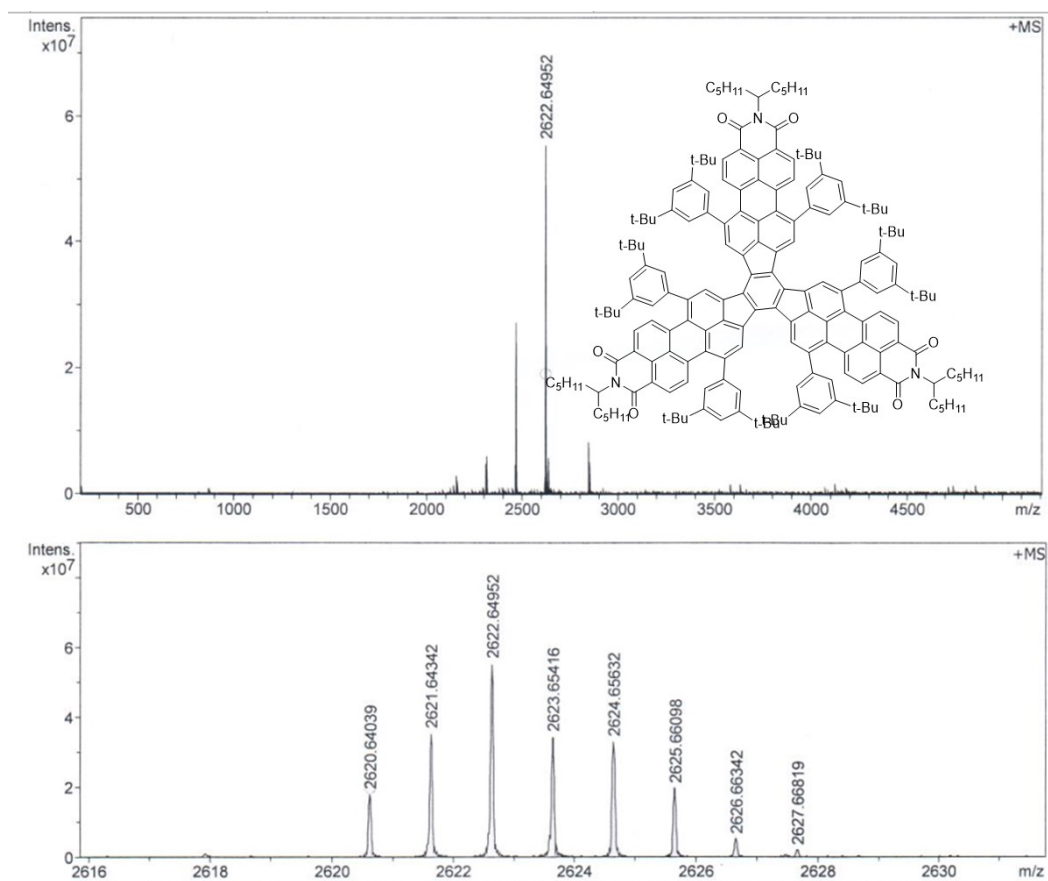

**Fig. S29** HR-MALDI-TOF spectrum of **5a**.

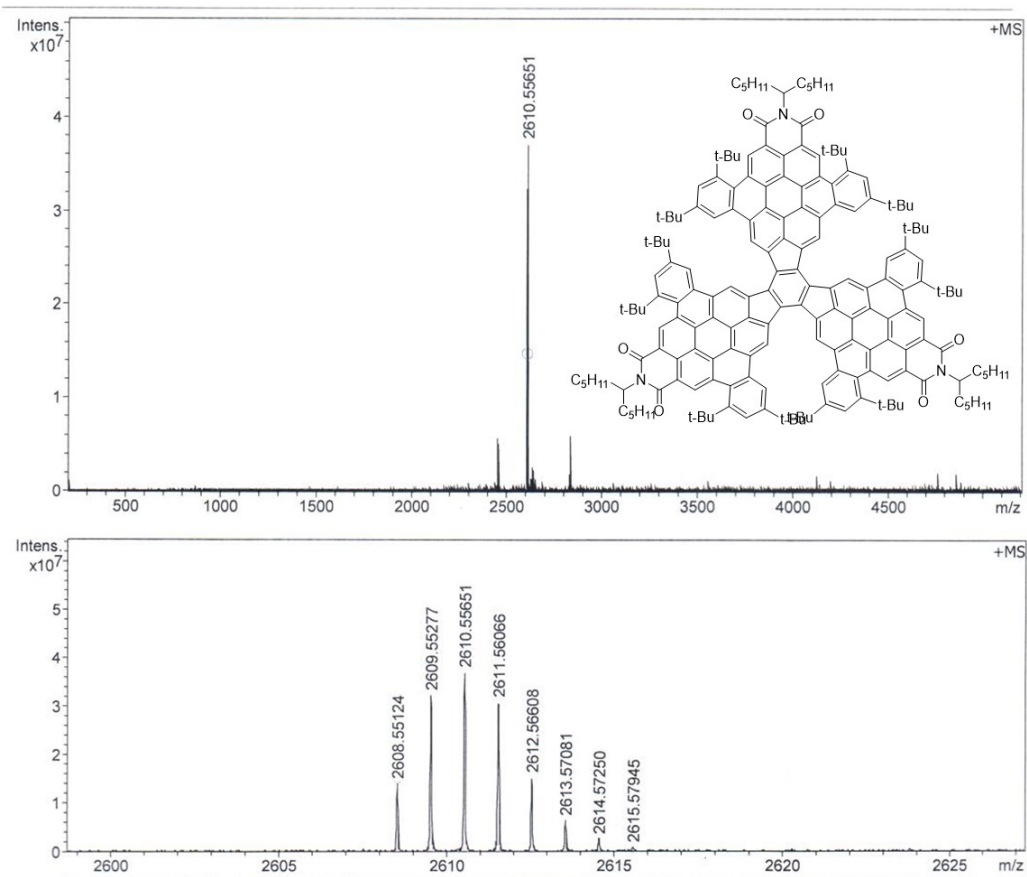

**Fig. S30** HR-MALDI-TOF spectrum of **6a**.

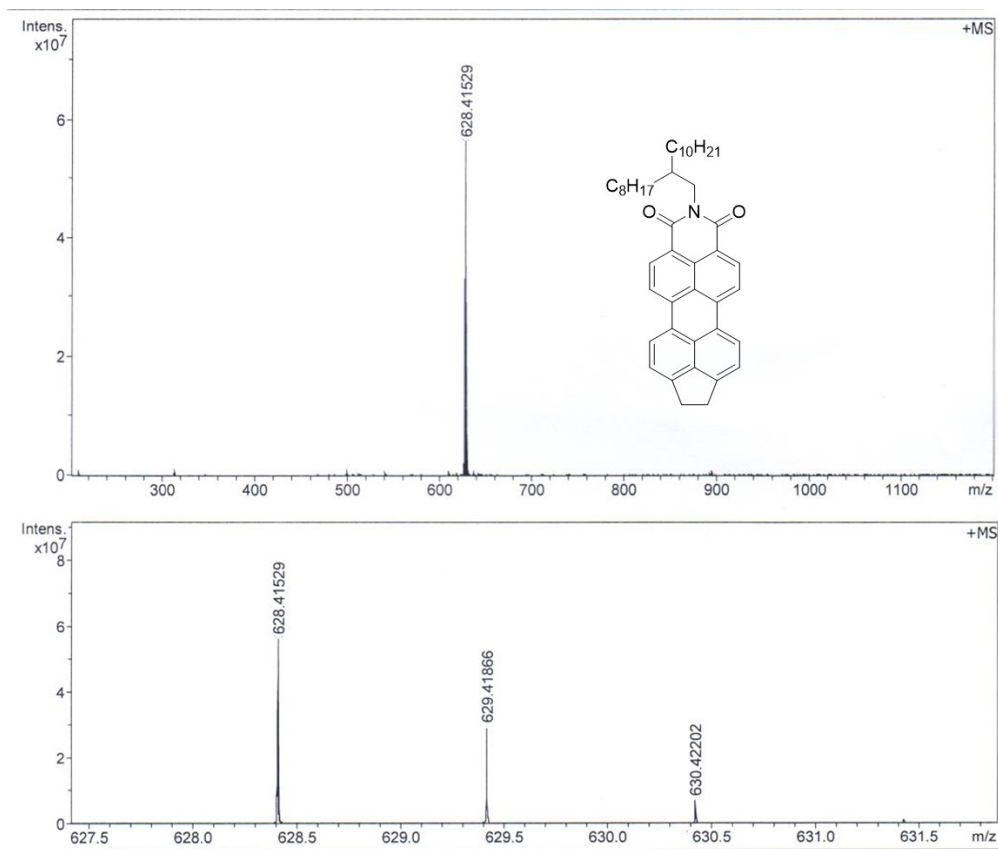

**Fig. S31** HR-MALDI-TOF spectrum of **1b**.

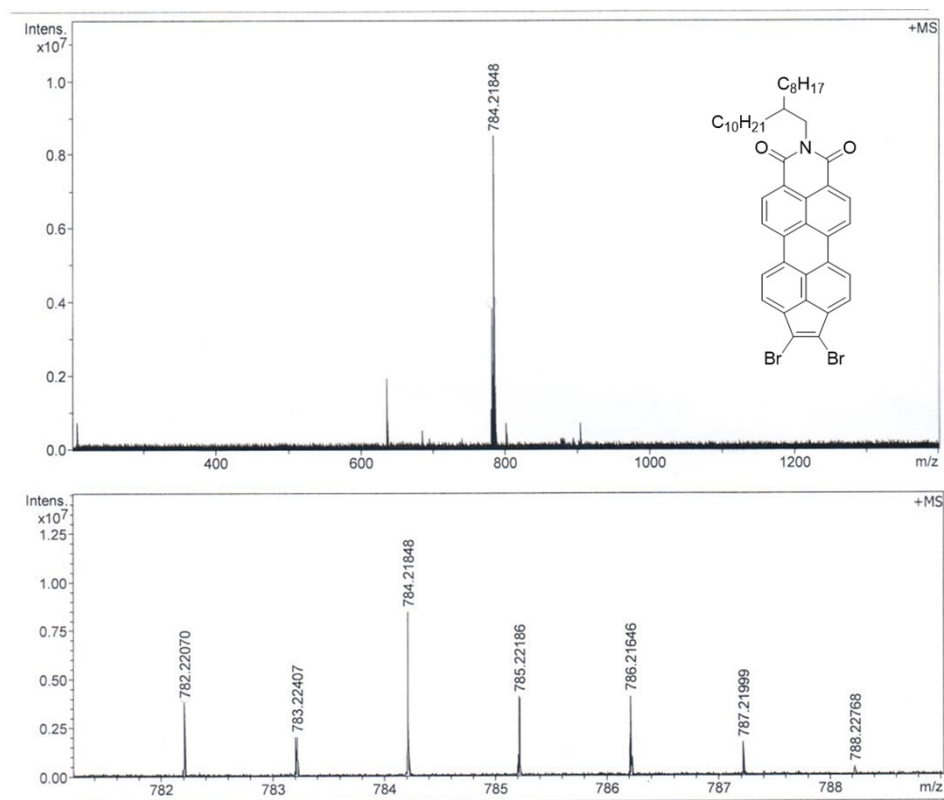

**Fig. S32** HR-MALDI-TOF spectrum of **2b**.

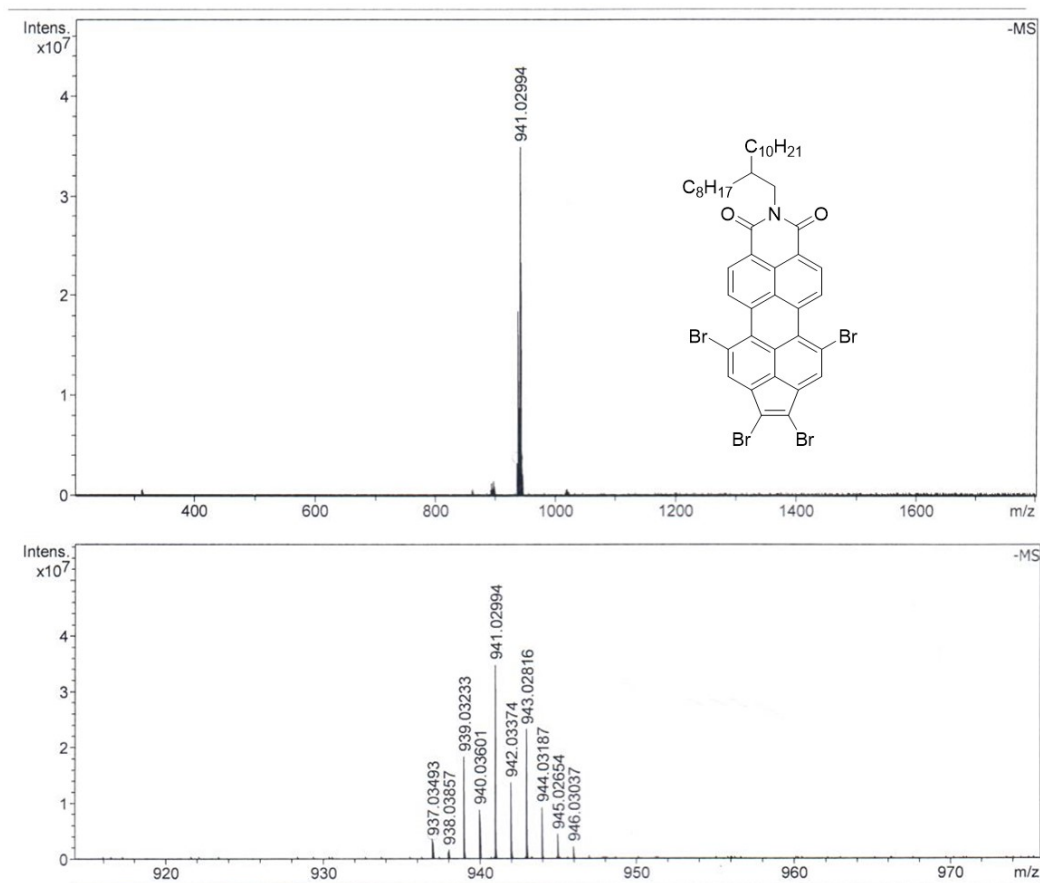

**Fig. S33** HR-MALDI-TOF spectrum of **3b**.

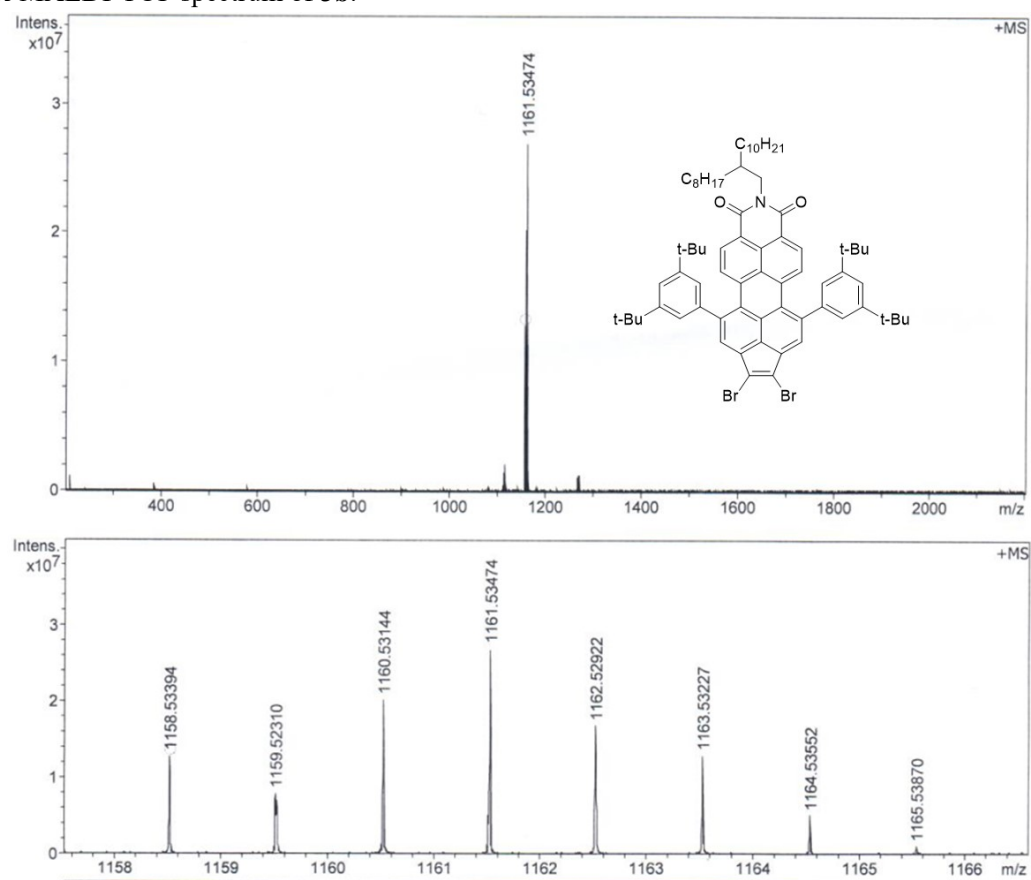

**Fig. S34** HR-MALDI-TOF spectrum of **4b**.

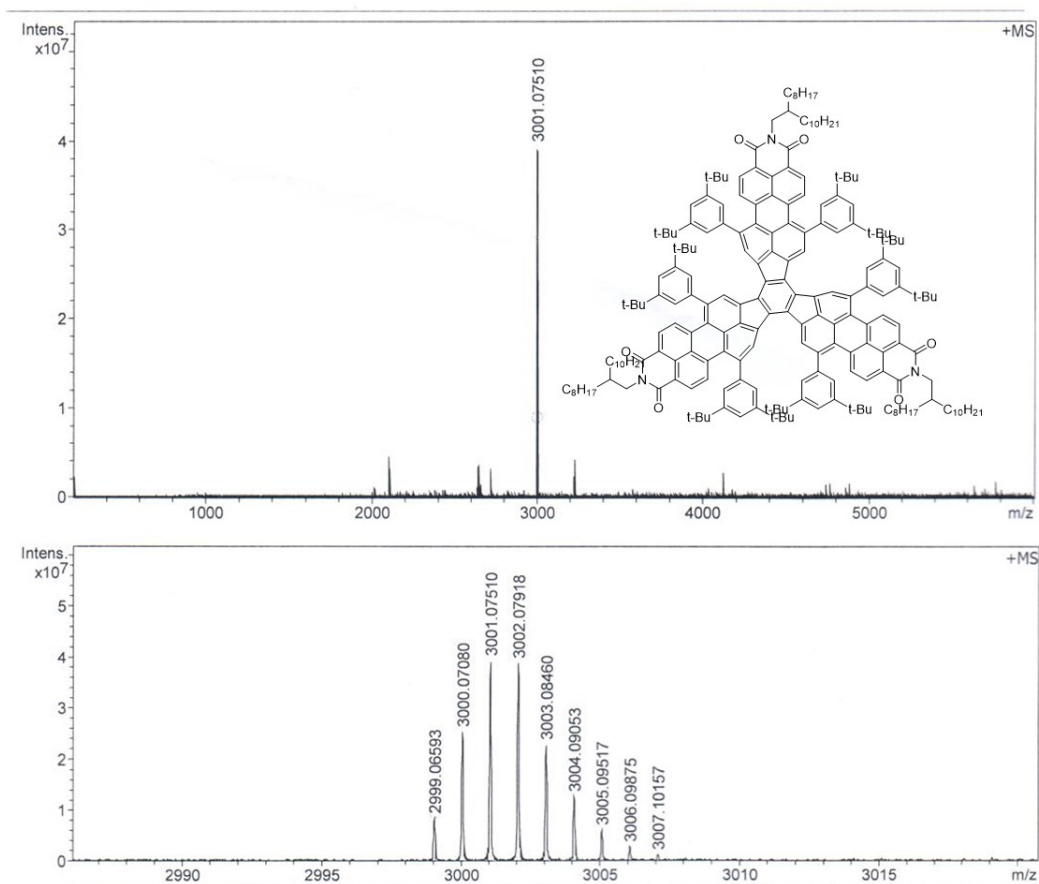

**Fig. S35** HR-MALDI-TOF spectrum of **5b**.

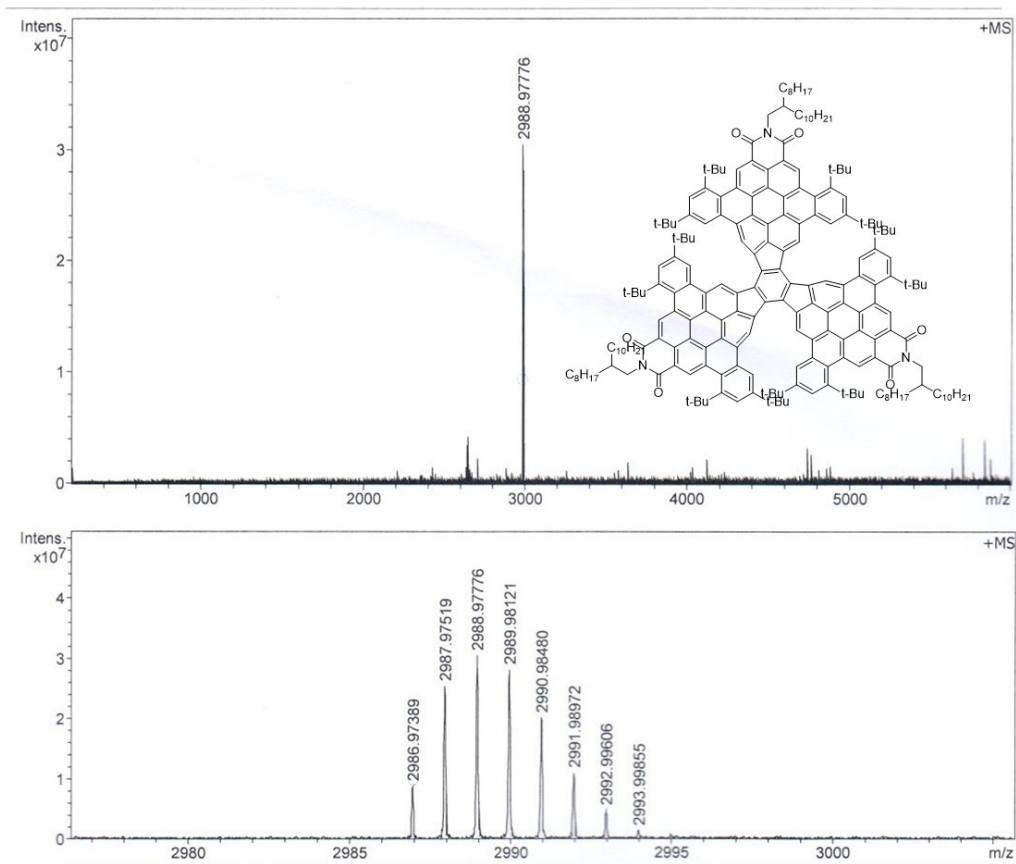

**Fig. S36** HR-MALDI-TOF spectrum of **6b**.

## 10. References

- [1] P. de Echegaray, M. J. Mancheño, I. Arrechea-Marcos, R. Juárez, G. López-Espejo, J. T. L. Navarrete, M. M. Ramos, C. Seoane, R. P. Ortiz and J. L. Segura, *J. Org. Chem*, 2016, **81**, 11256.
- [2] P. v R. Schleyer, C. Maerker, A. Dransfeld, H. Jiao, N. J. R. van Eikema Hommes, *J. Am. Chem. Soc.*, 1996, **118**, 6317.
- [3] H. Fallah-Bagher-Shaidaei, C. S. Wannere, C. Corminboeuf, R. Puchta, P. v. R. Schleyer, *Org. Lett.*, 2006, **8**, 863.
- [4] T. Lu, F. Chen, *J. Comput. Chem*, 2012, **33**, 580.
